# Supplementary material for: IMPACT study on intervening with a manualised package to achieve treatment adherence in people with tuberculosis: protocol paper for a mixed-methods study, including a pilot randomised controlled trial
Source: PubMed Central journal article supplement (PMC6937100; doi:10.1136/bmjopen-2019-032760), 2019-12-17
Supplement: bmjopen-2019-032760.draft_revisions.pdf [file bmjopen-2019-032760.draft_revisions.pdf]

# BMJ Open

BMJ Open is committed to open peer review. As part of this commitment we make the peer review history of every article we publish publicly available.

When an article is published we post the peer reviewers' comments and the authors' responses online. We also post the versions of the paper that were used during peer review. These are the versions that the peer review comments apply to.

The versions of the paper that follow are the versions that were submitted during the peer review process. They are not the versions of record or the final published versions. They should not be cited or distributed as the published version of this manuscript.

BMJ Open is an open access journal and the full, final, typeset and author-corrected version of record of the manuscript is available on our site with no access controls, subscription charges or pay-per-view fees (<http://bmjopen.bmj.com>).

If you have any questions on BMJ Open's open peer review process please email [info.bmjopen@bmj.com](mailto:info.bmjopen@bmj.com)

# BMJ Open

## The IMPACT Study: Intervening with a Manualised Package to ACHieve treatment adherence in people with Tuberculosis: A mixed methods approach, including a pilot randomised controlled trial

|                               |                                                                                                                                                                                                                                                                                                                                                                                                                                                                                                                                                                                                                                                                                                                                                                                                                                                                     |
|-------------------------------|---------------------------------------------------------------------------------------------------------------------------------------------------------------------------------------------------------------------------------------------------------------------------------------------------------------------------------------------------------------------------------------------------------------------------------------------------------------------------------------------------------------------------------------------------------------------------------------------------------------------------------------------------------------------------------------------------------------------------------------------------------------------------------------------------------------------------------------------------------------------|
| Journal:                      | <i>BMJ Open</i>                                                                                                                                                                                                                                                                                                                                                                                                                                                                                                                                                                                                                                                                                                                                                                                                                                                     |
| Manuscript ID                 | bmjopen-2019-032760                                                                                                                                                                                                                                                                                                                                                                                                                                                                                                                                                                                                                                                                                                                                                                                                                                                 |
| Article Type:                 | Protocol                                                                                                                                                                                                                                                                                                                                                                                                                                                                                                                                                                                                                                                                                                                                                                                                                                                            |
| Date Submitted by the Author: | 05-Jul-2019                                                                                                                                                                                                                                                                                                                                                                                                                                                                                                                                                                                                                                                                                                                                                                                                                                                         |
| Complete List of Authors:     | Stagg, Helen R.; University of Edinburgh, Usher Institute<br>Abubakar, Ibrahim; University College London<br>Campbell, Colin; Public Health England, Tuberculosis Section, Centre for Infectious Disease Surveillance and Control, National Infection Service<br>Copas, Andrew; UCL<br>Darvell, Marcia; University College London<br>Horne, Robert; University College London<br>Kielmann, Karina; Queen Margaret University Edinburgh<br>Kunst, Heinke; Queen Mary University of London, Department of Respiratory Medicine<br>Mandelbaum, Mike; TB Alert<br>Pickett, Elisha; Royal Free London NHS Foundation Trust<br>Story, Alistair; University College Hospitals NHS Foundation Trust, Find&Treat<br>Vidal, Nicole; Queen Margaret University Edinburgh<br>Wurie, Fatima; University College London,<br>Lipman, Marc; Royal Free Campus, Respiratory Medicine |
| Keywords:                     | Tuberculosis < INFECTIOUS DISEASES, medication adherence, manuals, Protocols & guidelines < HEALTH SERVICES ADMINISTRATION & MANAGEMENT, pilot studies                                                                                                                                                                                                                                                                                                                                                                                                                                                                                                                                                                                                                                                                                                              |
|                               |                                                                                                                                                                                                                                                                                                                                                                                                                                                                                                                                                                                                                                                                                                                                                                                                                                                                     |

SCHOLARONE™  
Manuscripts

# The IMPACT Study: Intervening with a Manualised Package to ACHieve treatment adherence in people with Tuberculosis: A mixed methods approach, including a pilot randomised controlled trial

**Author list:** Stagg HR<sup>1</sup>, Abubakar I<sup>2</sup>, Campbell CNJ<sup>2,3</sup>, Copas A<sup>2</sup>, Darvell M<sup>4</sup>, Horne R<sup>5</sup>, Kielmann K<sup>6</sup>, Kunst H<sup>7</sup>, Mandelbaum M<sup>8</sup>, Pickett E<sup>9</sup>, Story A<sup>10,11</sup>, Vidal N<sup>6</sup>, Wurie F<sup>3,12</sup>, Lipman M<sup>4,9</sup>

1. Usher Institute of Population Health Sciences and Informatics, The University of Edinburgh, MacKenzie House, 30 West Richmond Street, Edinburgh, EH8 9DX, UK
2. Institute for Global Health, University College London, 4th floor, Mortimer Market Centre, off Capper Street, London, WC1E 6JB, UK
3. TB Unit, National Infection Service, Public Health England, 61 Colindale Avenue, London NW9 5EQ, UK
4. UCL Respiratory, Division of Medicine, University College London, London, UK
5. Centre for Behavioural Medicine, UCL School of Pharmacy, Mezzanine Floor, BMA House, Tavistock Square, London, WC1H 9JP, UK
6. Institute for Global Health and Development, Queen Margaret University, Musselburgh, East Lothian, Edinburgh, EH21 6UU, UK
7. Blizard Institute, Barts and The London School of Medicine and Dentistry, Queen Mary University of London, London, E1 2AT, UK
8. TB Alert, Community Base, 113 Queens Road, Brighton, BN1 3XG, UK
9. Department of Respiratory Medicine, Royal Free London NHS Foundation Trust, Pond Street, London, NW3 2QG, UK
10. Collaborative Centre for Inclusion Health, University College London, London, UK
11. Find & Treat, University College London Hospitals NHS Foundation Trust, 235 Euston Road, London, NW1 2BU, UK
12. Department of Epidemiology and Public Health, Institute of Epidemiology and Health Care, University College London, UK

**Corresponding author:** Marc Lipman, Department of Respiratory Medicine, Royal Free London NHS Foundation Trust, Pond Street, London, NW3 2QG, UK; [marclipman@nhs.net](mailto:marclipman@nhs.net)

**Word Count:** 3,900

**Key words:** tuberculosis, medication adherence, manuals, protocol, pilot studies

## Abstract

### Introduction

Compared to the rest of the UK and Western Europe, England has high rates of the infectious disease tuberculosis (TB). TB is curable, although treatment is for at least six months - and longer when disease is drug resistant. If patients miss too many doses (non-adherence), they may transmit infection for longer and the infecting bacteria may develop resistance to the standard drugs used for treatment. Non-adherence may therefore risk both their health and that of others. Within England, certain population groups are thought to be at higher risk of non-adherence, but the factors contributing to this have been insufficiently determined, as have the best interventions to promote adherence. The objective of this study is to develop a manualised package of interventions for use as part of routine care within National Health Services to address the social and cultural factors that lead to poor adherence to treatment for TB disease.

### Methods and analysis

This study uses a mixed methods approach, with six study components. These are: (i) scoping reviews of the literature, (ii) qualitative research with patients, carers and healthcare professionals, (iii) development of the intervention, (iv) a pilot randomised controlled trial of the manualised intervention, (v) a process evaluation to examine clinical utility, and (vi) a cost analysis.

### Ethics and dissemination

This study received ethics approval on 24<sup>th</sup> December 2018 from Camberwell St. Giles Ethics Committee, UK (REC reference 18/LO/1818). Findings will be published and disseminated through peer-reviewed publications and conference presentations, published in an end of study report to our funder (the National Institute for Health Research, UK), and presented to key stakeholders.

### Trial Registration Number

ISRCTN 95243114

## Article Summary: Strengths and limitations of this study

### Strengths

- Patient-centred, mixed methods approach, based on a robust understanding of the evidence on social, cultural and personal factors that influence adherence to medication to treat tuberculosis.
- Evidence and experience of adherence captured from a variety of perspectives from across the UK, including patients, their carers, and healthcare workers.
- Generalisable patient population of individuals at risk of non-adherence across low tuberculosis (TB) incidence settings.
- Development of a pragmatic and easy-to-use tool that captures the best evidence on adherence and allows its application in the clinic setting.

### Limitations

- The study culminates in a pilot trial of the manualised intervention; a larger subsequent definitive trial is needed to test whether the intervention is efficacious and cost-effective beyond any initial conclusions regarding validity and feasibility derived from the pilot.

## Introduction

Against a background of rising tuberculosis (TB) in the 1990s and 2000s, the need for a comprehensive approach to TB control in England was deemed necessary by Public Health England (PHE) and the National Health Service (NHS) England. In January 2015, these bodies jointly launched the 'Collaborative Tuberculosis Strategy for England 2015-2020'[1]. This seeks to reduce TB incidence, decrease health inequalities, and ultimately contribute to international efforts to eliminate TB as a public health problem. Ensuring that people can take all of their medication as prescribed is one of the strategy's priorities, as poor adherence to treatment for TB is a driver of worse patient outcomes[2–9], increases the risk of transmission (due to delayed sputum culture conversion)[10], and can promote the development of drug resistance[3,11–16]. Subsequent National Institute for Health and Care Excellence (NICE) guidance noted the lack of robust TB research in this area[17].

Barriers to optimal adherence to treatment for TB may occur for a number of reasons. These include:

- patient-related factors, including perceptions and beliefs,
- cultural influences and current mental state,
- structural economic factors and social support networks,
- health service factors that include treatment complexity as well as accessibility of those services and the relationships patients develop with service providers[18,19].

Non-adherence is not a single issue and may take various forms e.g. suboptimal implementation (skipping doses), or stopping treatment early (for example, as soon as a patient feels better; this is discontinuation)[20].

Although a series of studies have been undertaken to define the population groups most at risk of non-adherence[19], it is currently difficult, prior to starting medication, to identify who may struggle with taking treatment as prescribed. To date, methods to support treatment address some, but not all, of the important underlying reasons for poor adherence. For example, the World Health Organization's recent focus on digital technologies reflects our attention on individual-level determinants of adherence and reminder/observation-based systems[21]; far less research has addressed the social and structural barriers to staying on TB treatment.

In the UK, the development of an intervention to support adherence to treatment that is sensitive to the individual's cultural background and social circumstances, and can be routinely delivered within the NHS, is critical. To this purpose, a mixed-methods, patient-centred, approach to the study of the modifiable factors that influence patients' adherence to treatment for TB is required.

## Methods and analysis

### Research question

Can a manualised intervention be developed to address the social, cultural, and structural barriers that lead to non-adherence to treatment in NHS patients with active TB?

### Aim

To develop, pilot, and evaluate process and interim outcomes for an effective manualised intervention that improves the likelihood of treatment completion among NHS patients at risk of poor adherence due to social, cultural, and structural factors.

## Objectives

- 1) Synthesise current knowledge on (a) determinants of adherence to treatment for TB, and (b) interventions that can support adherence, with particular emphasis on social and cultural barriers. (Scoping Review and Conceptual Framework)
- 2) Apply a conceptual framework of adherence endorsed by NICE guidelines (the Perceptions and Practicalities (PAPA) approach [18]) to elucidate and address the personal, socio-cultural, and health systems context, mechanisms, and pathways of poor adherence among NHS patients with TB. (Formative Research)
- 3) Develop a manualised intervention with multiple components that can identify (a) NHS patients most at risk of non-adherence, (b) the salient modifiable barriers, and (c) the tailored support mechanisms required to meet individual patient needs by matching appropriate interventions to specific barriers, as recommended by NICE. (Development of Intervention)
- 4) Pilot the intervention package in people at risk of poor adherence to define how the components work in combination and separately. (Pilot Study)
- 5) Evaluate the process of implementation of this intervention through describing the challenges and facilitators in delivering the package as intended (fidelity, reach) and assessing the impact of the intervention through evaluation of adherence indicators. (Process Evaluation)
- 6) Use the findings of the pilot to assess the costs of delivering the manualised intervention in an NHS setting, and to guide development of a proposal for a full randomised controlled trial (RCT).

## Study design

This study uses a mixed methods approach. There are six sub-sections, reflecting the six objectives: i) Scoping Review and Conceptual Framework, ii) Formative Research, iii) Development of Intervention, iv) Pilot Study, v) Process Evaluation, vi) Cost Analysis and Future Work. Although the different elements are described separately below, the research activities for each will overlap, and some will run concurrently. The full programme of work and relationships between subsections is shown in Figure 1.

### i. Scoping Review

To underpin the development of the manualised intervention, the first study sub-section will undertake literature reviews to answer the following research questions:

- i) What personal, social, cultural, health systems-related and structural factors affect individuals' ability to adhere to treatment for TB?
- ii) What kinds of intervention have been developed to address the multiple levels (personal, social, cultural, systems and structural) at which barriers to adherence may operate?
- iii) What is the evidence for the successful impact of interventions to address barriers to adherence to treatment for TB?

These questions will be answered through the three following reviews:

**1) A scoping review of qualitative studies** that examine the personal, social, cultural, health systems-related and structural factors affecting adherence to treatment for TB from the perspectives of adult patients, care givers, or health care providers, as well as studies that evaluate interventions to support adherence to treatment for TB.

1  
2  
3  
4 **2) A critical review of quantitative studies** examining the personal, social, cultural, health systems-  
5 related and structural factors affecting adherence to treatment for TB.  
6

7  
8 **3) A critical review of quantitative studies that have examined the effectiveness of interventions**  
9 **to improve adherence in people taking treatment for TB**, building on existing systematic reviews,  
10 including the provision and delivery of information and/or education; enablers and/or incentives;  
11 social support; case management approaches.  
12

13  
14 Together, these three reviews will enable us to conduct a critical interpretive synthesis of findings  
15 from qualitative and quantitative studies examining the assumptions and mechanisms of effect  
16 underlying interventions to improve adherence to treatment for TB.  
17

## 18 19 **ii. Formative Research**

### 20 21 **Formative research methods, recruitment and eligibility**

22  
23 In line with findings from the scoping review, we will develop topic guides for qualitative interviews  
24 exploring current models of TB service delivery in the study sites, providers' views on the barriers  
25 and facilitators for treatment adherence, and TB patients' and their family members' experiences of  
26 starting and staying on treatment. The thematic analysis of these interviews will complement  
27 insights gained from the scoping reviews which will allow us to refine a conceptual framework of  
28 adherence building on the Perceptions and Practicalities Approach (PAPA) [18]. Approximately 60  
29 participants will be enrolled.  
30  
31

32  
33 Adults (aged 18 and over) who are currently taking or recently completed treatment will be  
34 identified by the local TB service at four UK sites (Edinburgh, London [Central London & East London]  
35 and Southampton) and asked to take part in the study. The services have been chosen for their  
36 patient diversity, geographic spread and as reflecting the national TB picture. The patient group will  
37 be enriched with people who have been poorly adherent to treatment, although we will also include  
38 patients who report full adherence so that we can capture what may have enabled them to take  
39 treatment as prescribed. With patient consent, family members and/or carers will also be  
40 approached and asked to participate.  
41

42  
43 Health and social care workers from both primary and secondary care settings will be directly  
44 approached by researchers and invited to be interviewed. All those approached will be aged 18 or  
45 over and involved in TB management and care.  
46

### 47 48 **Data collection methods**

49  
50 Three different methods of data collection will be used to undertake the formative research.

#### 51 52 **1) In-depth interviews – patients and family members/carers**

53  
54 These will be conducted as individual interviews with approximately 30 participants, using a topic  
55 guide. The areas to be explored are: self-perception; personal beliefs and practices related to  
56 medicine-taking; health literacy and health-seeking behaviour; social support; cultural norms around  
57 health-seeking behaviour; financial and other structural barriers.  
58  
59  
60



## 2) Cognitive assessments - patients

To ensure that the validated questionnaires (i.e. Beliefs about Medicines Questionnaires[22] and the Brief Illness Perception Questionnaire[23]), are accessible and acceptable to patients, we will also conduct cognitive interviews with 10 patients. We will then have confidence to use them in the later pilot study to assess patient perceptions and practicalities affecting adherence to anti-TB therapy. These will explore self-perception; personal beliefs; and practices related to medicine-taking.

## 3) Semi-structured Interviews – healthcare providers

These will be undertaken with health care providers responsible for multiple aspects of TB care (doctors, nurses, social workers, directly observed therapy [DOT] providers, managers and administrators). They will focus on providers' perceptions of factors affecting patient understanding of TB and its treatment; service delivery models including staffing; organisation of care; communication. We will interview four to six providers at each site, aiming for a total of 20 interviews.

### iii. Development of the manualised intervention

#### Intervention development process

The data collected from the scoping reviews and formative research will be presented to, and synthesised by, an Intervention Development Group (IDG). A manualised intervention will be developed to identify (a) NHS patients most at risk of non-adherence, (b) their salient modifiable barriers, and (c) the tailored support mechanisms that meet individual patient needs by matching appropriate interventions to these specific barriers.

The IDG will include:

- patients (in particular the homeless, ethnic minorities, migrants new to the UK, and patients with drug resistant TB)
- family members/significant others of affected persons
- members of the public
- health care professionals (from both primary and secondary care)
- other professionals who work with patients/communities affected by TB

The constitution of the IDG will enable a co-production approach to ensure that the intervention is pragmatic, can be delivered within the context of existing care pathways, and is of benefit to service users and those who are likely to access the intervention.

#### Intervention contents

The manualised intervention is likely to consist of a screening and assessment tool, in addition to a package of measures that can be tailored to the needs of individual patients from different population groups.

As patterns of adherence may be irregular over time, it is intended that the manualised intervention will be administered to all patients at each patient review. The tool thus needs to be quick and easy to administer. It may be electronically linked to patient records, enabling a comprehensive picture of the risk of possible non-adherence to be developed for each patient, as well as within a clinic population. The various delivery options for the intervention (such as using paper or an app) will be considered during its development stage.

The menu of supportive measures may, for example, include:

- Informational intervention: e.g. providing a convincing story setting out the rationale and on-going need for medication, addressing concerns about potential adverse effects and consequences of treatment and what to do if such events occur e.g. the participant will be informed that it is possible to change their treatment regimens to alternatives[24].
- Practicalities and Capability based interventions: video observed therapy [VOT], DOT, reminders including text messaging, automated methods for monitoring and feedback including electronic dosette boxes, use of a medication app, incentives e.g. financial and food vouchers, mitigation and management of drug toxicity due to treatments.
- Social and system interventions: offering flexibility in appointments; enhanced guidance on 'navigating' clinic pathways; signposting patients to relevant services, e.g. housing, drug and alcohol services, and social care; providing peer-support.

#### iv. Piloting the intervention

##### Study design, recruitment and eligibility

Once the intervention is developed, proof-of-concept is required within the real world. This will be undertaken using a cluster randomised pilot study that compares the manualised intervention to the usual standard of care in four London clinics treating TB. Two clinics will be randomly allocated to the intervention and two to standard of care. Participants starting treatment for TB will be enrolled. These are likely to include people at greater risk of poor adherence such as migrants newly arrived in the UK, people whose first language is not English, people with a mental health disorder, people taking immunosuppressive therapy or known to have immunodeficiency, those with a previous history of treatment for TB, or poor-adherence with anti-TB medication, and people with a current or previous history of drug or alcohol misuse.

Patients included in the pilot study will be aged 18 or over and will be started on treatment for TB, irrespective of site of disease. We will exclude patients who are unable to provide informed consent, those already on treatment and those who are not expected to live for the duration of the study (a minimum of six months from starting treatment).

The purpose of the pilot study is not formal hypothesis testing. Given this, a target sample size of 80 patients enrolled (20 per site) was identified for the pilot study as providing useful information that can help determine whether the intervention will be deliverable within a clinical setting. It will also guide the development of a possible larger definitive study using the intervention. The four TB clinics of interest (in East and North London) each treat in excess of 60 relevant patients per annum.

Based on usage of DOT within the clinic populations seen at the treatment sites (i.e. individuals currently identified as needing adherence support), we estimate that around 33% of patients will be at risk of non-adherence. Taking this as a minimum (as the manualised intervention is likely to be more sensitive than current risk assessments), we would expect that at least 26 of the 80 patients recruited will be identified as requiring adherence support. This sample size allows us to measure consent to enrolment for 80 individuals, data completeness for adherence and treatment outcomes for 80 individuals, data on acceptability and feasibility of the intervention package for around 40 individuals, and data on acceptability and feasibility of adherence support for at least 26 individuals (13 receiving the manualised intervention and 13 standard care).

##### Outcomes of the pilot

The primary outcome of the study will be level of adherence, measured as the proportion of prescribed doses taken and assessed at six months from the start of treatment. In addition to this

primary outcome, a number of secondary outcomes will also be measured, as follows:

- 1) Proportion consenting to the study.
- 2) Completeness of data for measures of adherence and treatment completion.
- 3) Proportion of patients withdrawing during the study and the reasons why.
- 4) Proportion of patients identified as needing adherence support in the intervention arm.
- 5) Proportion of patients offered adherence support and accepting it in the intervention arm.
- 6) Documentation of which adherence-promoting activities have been implemented among patients both in the standard of care and intervention arm, and when.
- 7) Detailed treatment implementation information: e.g. proportion of patients completing treatment, proportion of patients still on treatment after nine months or at study completion (whichever is the earlier).
- 8) Patterns of adherence (implementation and discontinuation).
- 9) Impact of manualised intervention on maintaining adherence over the duration of treatment.
- 10) Process variables – adherence-related perceptions and practicalities.

### **Measures of treatment completion and adherence**

Our primary measure of adherence will be pill counts performed by the research nurse or clinical team. Other measures will also be used, and compared with pill counts. Patients within the study will be asked to bring their medication to each appointment, so that it can be counted and compared to expected levels based on what has been prescribed. In the case of DOT or VOT methods being used, a record of missed doses will be kept.

At each appointment, participants will also be asked to provide a 5ml sample of urine to check for adherence to the prescribed anti-TB medication; and they will be asked directly whether they have managed to take all their medicines and if they have missed any doses [25].

### **Administration of the manualised intervention**

The patient's case manager (usually the TB clinic nurse), plus a study research nurse, will apply the intervention in partnership with the patient to identify whether personal, socio-cultural and/or systems risk factors are present that suggest likely poor adherence with treatment. If these are identified, then the relevant measures outlined in the manualised intervention that may mitigate these will be reviewed and implemented with the agreement of the participant. These will be continued throughout the course of treatment, or stopped if no longer deemed to be relevant or required on reassessment.

### **Study schedule of visits**

Study subjects will be seen at weeks 0, 2, 4, 8, 12, 16, 20 and 24 (earliest date of treatment completion). Should they require on-going treatment after six months, they will be seen as clinically indicated. At each review, adherence assessments will be performed in addition to an assessment of perceptions and practicalities, the completion of the BMQ and the EQ-5D-5L Quality of Life questionnaire[22,26]. The manualised intervention will be applied if the patient is attending a clinic that has been randomised to the intervention arm.

### **Follow Up**

Most patients who do not have clinically important drug resistant disease receive six months of treatment. To allow for treatment interruptions, patients within the pilot study will be followed to either treatment completion or for a total of nine months from starting anti-TB therapy.

### Analysis and interpretation

Where possible, univariable analyses such as Fisher's exact test will be undertaken to compare each outcome measure listed earlier between study arms (intervention and control). An assessment of the balance in baseline characteristics between the study arms will also be conducted. If randomisation has failed to evenly distribute key baseline characteristics (e.g. age, sex, ethnicity, or other factors identified as important during the scoping reviews), then multivariable logistic regression analyses adjusting for these factors will also be undertaken, subject to constraints on the degree of adjustment, which depend on the prevalence of the outcome and sample size. Inter-site variability in outcomes will be measured. The need to adjust for clustering by clinical care provider will be assessed; clustering by site alone cannot be formally adjusted for due to the modest number of sites in the pilot study.

The analysis of the first three of our secondary outcomes will address the feasibility of a definitive trial following a similar design to the pilot. Analysis of secondary outcomes four to six addresses the intervention, and complements the process evaluation (see below). Analysis of the primary outcome and final secondary outcomes around treatment adherence and completion provides initial information - given the modest sample size - concerning the effectiveness of the intervention, and may assist the sample size calculation for the definitive trial. They can also offer an alert in the unlikely event that the intervention is harmful.

### v. Process evaluation

#### Evaluation method

We will evaluate the implementation process by analysing the challenges and facilitators in delivering the package. The impact of the intervention will be assessed by evaluation of adherence indicators. We will use the findings of the pilot to assess the costs of delivering the manualised intervention in an NHS setting, and to guide development of a proposal for a full RCT.

The process evaluation will consist of a description of the process of intervention implementation. It will assess how well the manualised intervention achieves its intended aim compared to standard care.

We will consider:

- 1) The fidelity of the intervention as delivered in comparison to how it was designed and envisaged,
- 2) The reach of the intervention (the proportion of the target group receiving it),
- 3) The barriers to facilitating implementation of the intervention and how these can be addressed,
- 4) The pre-existing factors that facilitated implementation.

#### Process measures, recruitment and eligibility

Process measures for each element of the package will be developed once the manual development has been completed, and used to assess success. They will include acceptability, uptake and change in practice. We will work with patients and staff separately at all four London sites. We will interview 20 patients (five at each study site i.e. 10 from each arm); and, if possible, 20 health care workers (five at each site). The patients will be selected within each site using purposeful sampling of clinic lists of every fourth patient with active TB.

Key outputs will include a qualitative evaluation of delivery, the development of a narrative description of the process of intervention implementation and maintenance and a quantitative

1  
2  
3 assessment of adherence-related perceptions and practicalities within intervention and control  
4 groups.  
5

6 We will invite participation in the process evaluation from patients enrolled in the pilot study or staff  
7 members treating patients at one of the four London sites also involved in delivering the pilot study.  
8 They will be included if they are aged 18 or over and able to provide informed consent.  
9

## 10 11 **vi. Cost Analysis and Future Work**

12  
13 In order to generate realistic estimates of the cost of the intervention, cost data from the NHS  
14 perspective will be collected during the pilot study using NICE guideline implementation tools.  
15

16  
17 After the pilot study and process evaluation have been completed, a final intervention package will  
18 be designed for use in a definitive RCT of the manualised package of interventions. The design of this  
19 final package will be based on the results of the process evaluation and the experience gained during  
20 the piloting of the intervention, modifying the definitive trial design and/or data collection  
21 accordingly.  
22

## 23 24 **Patient and public engagement**

25 As documented above, patient representatives will sit on the IDG for the study. In addition, TB Alert,  
26 the UK's only national TB charity, has membership of the IDG. The role of the IDG, which will meet  
27 regularly throughout the study, is described in section iii. At the end of the study, the IDG will be  
28 involved in commenting on the findings and contributing to the dissemination plan.  
29

## 30 31 **Ethics and dissemination**

32 This study received ethics approval on 24<sup>th</sup> December 2018 from Camberwell St Giles Ethics  
33 Committee (REC reference 18/LO/1818). Findings will be published and disseminated through peer-  
34 reviewed publications and conference presentations, published in an end of study report to our  
35 funder (the National Institute for Health Research, UK), and presented to key stakeholders.  
36

## 37 38 **Conclusion**

39  
40 Our study will develop and pilot a manualised intervention to improve adherence to treatment for  
41 TB in the UK using a mixed methods, patient-centred and provider-informed approach. This will  
42 enable us to begin to understand what motivates patients' treatment behaviour, whilst ensuring  
43 deliverability within the NHS. Our work is based on a robust understanding of the evidence on social,  
44 cultural and personal factors that influence adherence, and the interventions that are most effective  
45 in addressing these. The study reflects the geographic spread of TB in the UK and captures not only  
46 patient and expert clinical and academic experience, but also that of family and carers to develop  
47 the intervention. A key feature of the study is the co-production of a pragmatic and easy-to-use tool  
48 that utilises the best evidence on adherence, and allows its application in the clinic setting in a  
49 dynamic and iterative way.  
50

51  
52 Although the final pilot study may be limited to a relatively small sample size, it is hoped that its  
53 broad patient-centred perspective will make a useful contribution to our understanding of, and  
54 ability to deal effectively with, the risks of non-adherence to TB treatment in a population that can  
55 find this challenging. As many of the factors influencing adherence are likely to be generalisable to  
56 patients with other conditions in both high and low resource settings, this study also has the  
57 potential to inform adherence interventions in other disease areas.  
58  
59  
60

### Authors' contributions

ML, IA, RH, KK and HRS conceived of the work. HRS, IA, AC, RH, KK, MM, AS, NV and ML designed the work. HRS, CNJC, MD, RH, KK, drafted the manuscript. All authors critically revised the manuscript and gave final approval of the version of the protocol manuscript to be published. All authors agree to be accountable for all aspects of the work in ensuring that questions related to the accuracy or integrity of any part are appropriately investigated and resolved.

### Funding statement

This work was supported by the National Institute for Health Research (NIHR) Health Technology Assessment Programme, UK grant number 16/88/06.

The views expressed are those of the author(s) and not necessarily those of the National Health Service, UK, the NIHR or the Department of Health and Social Care.

### Competing interests statement

IA, MD, HK, KK, ML, MM, EP, AS, FW have no competing interests to declare.

RH is supported by the National Institute for Health Research (NIHR, Collaboration for Leadership in Applied Health Research and Care (CLAHRC), North Thames at Bart's Health NHS Trust and Asthma UK (AUKCAR). Speaker engagements with honoraria with the following companies: Abbvie, Amgen, Astellas, AstraZeneca, Biogen, Erasmus, Idec, Gilead Sciences, GlaxoSmithKline, Janssen, Merck Sharp Dohme, Novartis, Pfizer, Roche, Shire Pharmaceuticals and TEVA. Professor Rob Horne is Founding Director of a UCL-Business spin-out company (Spoonful of Sugar Ltd) providing consultancy on treatment engagement and patient support programmes to healthcare policy makers, providers and industry.

HRS reports grants from Medical Research Council (MRC), UK, grants from National Institute for Health Research (NIHR), UK, during the conduct of the study; other from Korean CDC and Johnson and Johnson (makers of Bedaquiline), other from Latvian Society Against Tuberculosis (funding through Otsuka and Johnson and Johnson), outside the submitted work.

CNJC reports personal fees from Public Health England, outside the submitted work.



## References

- 1 Public Health England. Collaborative Tuberculosis Strategy for England 2015 to 2020. London: 2015. <https://www.gov.uk/government/publications/collaborative-tuberculosis-strategy-for-england>
- 2 Imperial MZ, Nahid P, Phillips PPJ, *et al.* A patient-level pooled analysis of treatment-shortening regimens for drug-susceptible pulmonary tuberculosis. *Nat Med* 2018;**24**:1708–15. doi:10.1038/s41591-018-0224-2
- 3 Kayigamba FR, Bakker MI, Mugisha V, *et al.* Adherence to Tuberculosis Treatment, Sputum Smear Conversion and Mortality: A Retrospective Cohort Study in 48 Rwandan Clinics. *PLoS One* 2013;**8**:e73501. doi:10.1371/journal.pone.0073501
- 4 Thomas A, Gopi PG, Santha T, *et al.* Predictors of relapse among pulmonary tuberculosis patients treated in a DOTS programme in South India. *Int J Tuberc Lung Dis* 2005;**9**:556–61. <http://www.ncbi.nlm.nih.gov/pubmed/15875929> (accessed 1 May 2019).
- 5 Valencia S, León M, Losada I, *et al.* How do we measure adherence to anti-tuberculosis treatment? *Expert Rev Anti Infect Ther* 2017;**15**:157–65. doi:10.1080/14787210.2017.1264270
- 6 van den Boogaard J, Boeree MJ, Kibiki GS, *et al.* The complexity of the adherence-response relationship in tuberculosis treatment: why are we still in the dark and how can we get out? *Trop Med Int Health* 2011;**16**:693–8. doi:10.1111/j.1365-3156.2011.02755.x
- 7 Zhdanov V, Bilenko N, Mor Z. Risk Factors for Recurrent Tuberculosis among Successfully Treated Patients in Israel, 1999–2011. *Isr Med Assoc J* 2017;**19**:237–41. <http://www.ncbi.nlm.nih.gov/pubmed/28480678> (accessed 1 May 2019).
- 8 Bastard M, Sanchez-Padilla E, Hewison C, *et al.* Effects of treatment interruption patterns on treatment success among patients with multidrug-resistant tuberculosis in Armenia and Abkhazia. *J Infect Dis* 2015;**211**:1607–15. doi:10.1093/infdis/jiu551
- 9 Podewils LJ, Gler MTS, Quelapio MI, *et al.* Patterns of Treatment Interruption among Patients with Multidrug-Resistant TB (MDR TB) and Association with Interim and Final Treatment Outcomes. *PLoS One* 2013;**8**:e70064. doi:10.1371/journal.pone.0070064
- 10 Chirwa T, Nyasulu P, Chirwa E, *et al.* Levels of tuberculosis treatment adherence among sputum smear positive pulmonary tuberculosis patients attending care at Zomba Central hospital, southern Malawi, 2007–2008. *PLoS One* 2013;**8**:e63050. doi:10.1371/journal.pone.0063050
- 11 Arnold A, Cooke GS, Kon OM, *et al.* Drug resistant TB: UK multicentre study (DRUMS): Treatment, management and outcomes in London and West Midlands 2008–2014. *J Infect* 2017;**74**:260–71. doi:10.1016/j.jinf.2016.12.005
- 12 Pritchard AJ, Hayward AC, Monk PN, *et al.* Risk factors for drug resistant tuberculosis in Leicestershire--poor adherence to treatment remains an important cause of resistance. *Epidemiol Infect* 2003;**130**:481–3. <http://www.ncbi.nlm.nih.gov/pubmed/12825732> (accessed 30 Jan 2019).
- 13 Cadosch D, Abel Zur Wiesch P, Kouyos R, *et al.* The Role of Adherence and Retreatment in De Novo Emergence of MDR-TB. *PLoS Comput Biol* 2016;**12**:e1004749. doi:10.1371/journal.pcbi.1004749
- 14 Saunders NJ, Trivedi UH, Thomson ML, *et al.* Deep resequencing of serial sputum isolates of Mycobacterium tuberculosis during therapeutic failure due to poor compliance reveals stepwise mutation of key resistance genes on an otherwise stable genetic background. *J Infect* 2011;**62**:212–7. doi:10.1016/j.jinf.2011.01.003
- 15 Shin SS, Keshavjee S, Gelmanova IY, *et al.* Development of Extensively Drug-resistant Tuberculosis during Multidrug-resistant Tuberculosis Treatment. *Am J Respir Crit Care Med* 2010;**182**:426–32. doi:10.1164/rccm.200911-1768OC
- 16 Bradford WZ, Martin JN, Reingold AL, *et al.* The changing epidemiology of acquired drug-resistant tuberculosis in San Francisco, USA. *Lancet* 1996;**348**:928–31. doi:10.1016/S0140-6736(96)03027-9

- 1  
2  
3  
4  
5  
6  
7  
8  
9  
10  
11  
12  
13  
14  
15  
16  
17  
18  
19  
20  
21  
22  
23  
24  
25  
26  
27  
28  
29  
30  
31  
32  
33  
34  
35  
36  
37  
38  
39  
40  
41  
42  
43  
44  
45  
46  
47  
48  
49  
50  
51  
52  
53  
54  
55  
56  
57  
58  
59  
60
- 17 NICE. NICE Guideline: Tuberculosis. Natl. Inst. Heal. Care Excell. 2016;:178.
- 18 Horne R, Weinman J, Barber N, *et al.* Concordance, adherence and compliance in medicine  
19 taking. 2005. doi:10.1007/SpringerReference\_64584
- 20 De Geest S, Sabaté E. Adherence to long-term therapies: Evidence for action. World Health  
21 Organization. Eur. J. Cardiovasc. Nurs. 2003. doi:10.1016/S1474-5151(03)00091-4
- 22 Vrijens B, De Geest S, Hughes DA, *et al.* A new taxonomy for describing and defining adherence  
23 to medications. *Br J Clin Pharmacol* 2012;**73**:691–705. doi:10.1111/j.1365-2125.2012.04167.x
- 24 World Health Organisation. *Handbook for the use of digital technologies to support tuberculosis  
25 medication adherence*. Geneva, Switzerland: 2017.
- 26 Horne R, Weinman J, Hankins M. The beliefs about medicines questionnaire: The development  
27 and evaluation of a new method for assessing the cognitive representation of medication.  
28 *Psychol Heal* 1999;**14**:1–24. doi:10.1080/08870449908407311
- 29 Broadbent E, Petrie KJ, Main J, *et al.* The Brief Illness Perception Questionnaire. *J Psychosom  
30 Res* 2006;**60**:631–7. doi:10.1016/j.jpsychores.2005.10.020
- 31 Michie S, van Stralen MM, West R. The behaviour change wheel: A new method for  
32 characterising and designing behaviour change interventions. *Implement Sci* 2011;**6**.  
33 doi:10.1186/1748-5908-6-42
- 34 Weiss JJ, Bräu N, Stivala A, *et al.* Review article: adherence to medication for chronic hepatitis  
35 C - building on the model of human immunodeficiency virus antiretroviral adherence research.  
36 *Aliment Pharmacol Ther* 2009;**30**:14–27. doi:10.1111/j.1365-2036.2009.04004.x
- 37 Herdman M, Gudex C, Lloyd A, *et al.* Development and preliminary testing of the new five-level  
38 version of EQ-5D (EQ-5D-5L). *Qual Life Res* 2011;**20**:1727–36. doi:10.1007/s11136-011-9903-x



## Figure legends

### Figure 1- The IMPACT study

The six mixed-methods elements of the IMPACT [Intervening with a Manualised Package to Achieve treatment adherence in people with Tuberculosis] study and the relationships between them. The study is guided by a steering group, which has oversight over the entire process and culminates in a pilot study with associated evaluatory elements.

For peer review only

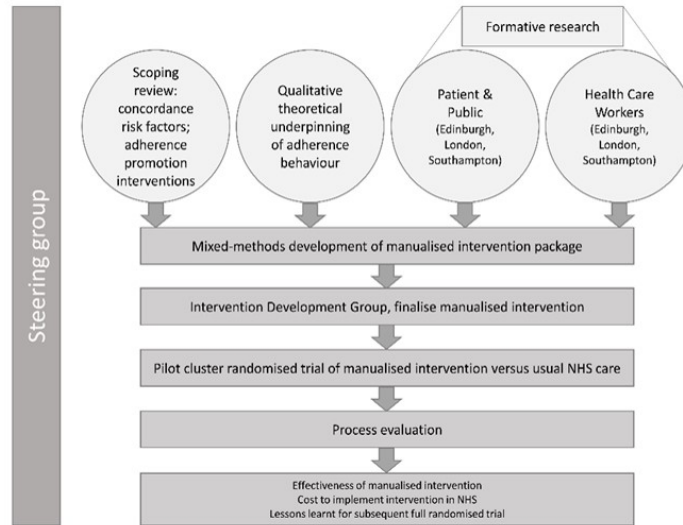

Figure 1- The IMPACT study

The six mixed-methods elements of the IMPACT [Intervening with a Manualised Package to Achieve treatment adherence in people with Tuberculosis] study and the relationships between them. The study is guided by a steering group, which has oversight over the entire process and culminates in a pilot study with associated evaluatory elements.

159x92mm (150 x 150 DPI)

# BMJ Open

## The IMPACT Study: Intervening with a Manualised Package to ACHieve treatment adherence in people with Tuberculosis: A mixed methods approach, including a pilot randomised controlled trial

|                                 |                                                                                                                                                                                                                                                                                                                                                                                                                                                                                                                                                                                                                                                                                                                                                                                                                                                                     |
|---------------------------------|---------------------------------------------------------------------------------------------------------------------------------------------------------------------------------------------------------------------------------------------------------------------------------------------------------------------------------------------------------------------------------------------------------------------------------------------------------------------------------------------------------------------------------------------------------------------------------------------------------------------------------------------------------------------------------------------------------------------------------------------------------------------------------------------------------------------------------------------------------------------|
| Journal:                        | <i>BMJ Open</i>                                                                                                                                                                                                                                                                                                                                                                                                                                                                                                                                                                                                                                                                                                                                                                                                                                                     |
| Manuscript ID                   | bmjopen-2019-032760.R1                                                                                                                                                                                                                                                                                                                                                                                                                                                                                                                                                                                                                                                                                                                                                                                                                                              |
| Article Type:                   | Protocol                                                                                                                                                                                                                                                                                                                                                                                                                                                                                                                                                                                                                                                                                                                                                                                                                                                            |
| Date Submitted by the Author:   | 18-Sep-2019                                                                                                                                                                                                                                                                                                                                                                                                                                                                                                                                                                                                                                                                                                                                                                                                                                                         |
| Complete List of Authors:       | Stagg, Helen R.; University of Edinburgh, Usher Institute<br>Abubakar, Ibrahim; University College London<br>Campbell, Colin; Public Health England, Tuberculosis Section, Centre for Infectious Disease Surveillance and Control, National Infection Service<br>Copas, Andrew; UCL<br>Darvell, Marcia; University College London<br>Horne, Robert; University College London<br>Kielmann, Karina; Queen Margaret University Edinburgh<br>Kunst, Heinke; Queen Mary University of London, Department of Respiratory Medicine<br>Mandelbaum, Mike; TB Alert<br>Pickett, Elisha; Royal Free London NHS Foundation Trust<br>Story, Alistair; University College Hospitals NHS Foundation Trust, Find&Treat<br>Vidal, Nicole; Queen Margaret University Edinburgh<br>Wurie, Fatima; University College London,<br>Lipman, Marc; Royal Free Campus, Respiratory Medicine |
| <b>Primary Subject Heading</b>: | Respiratory medicine                                                                                                                                                                                                                                                                                                                                                                                                                                                                                                                                                                                                                                                                                                                                                                                                                                                |
| Secondary Subject Heading:      | Patient-centred medicine, Infectious diseases, Epidemiology, Qualitative research                                                                                                                                                                                                                                                                                                                                                                                                                                                                                                                                                                                                                                                                                                                                                                                   |
| Keywords:                       | Tuberculosis < INFECTIOUS DISEASES, medication adherence, manuals, Protocols & guidelines < HEALTH SERVICES ADMINISTRATION & MANAGEMENT, pilot studies                                                                                                                                                                                                                                                                                                                                                                                                                                                                                                                                                                                                                                                                                                              |
|                                 |                                                                                                                                                                                                                                                                                                                                                                                                                                                                                                                                                                                                                                                                                                                                                                                                                                                                     |

SCHOLARONE™  
Manuscripts

1  
2  
3  
4  
5  
6  
7  
8  
9  
10  
11  
12  
13  
14  
15  
16  
17  
18  
19  
20  
21  
22  
23  
24  
25  
26  
27  
28  
29  
30  
31  
32  
33  
34  
35  
36  
37  
38  
39  
40  
41  
42  
43  
44  
45  
46  
47  
48  
49  
50  
51  
52  
53  
54  
55  
56  
57  
58  
59  
60

# 1 The IMPACT Study: Intervening with a Manualised Package to ACHieve 2 treatment adherence in people with Tuberculosis: A mixed methods 3 approach, including a pilot randomised controlled trial

4  
5 **Author list:** Stagg HR<sup>1</sup>, Abubakar I<sup>2</sup>, Campbell CNJ<sup>2,3</sup>, Copas A<sup>2</sup>, Darvell M<sup>4</sup>, Horne R<sup>5</sup>,  
6 Kielmann K<sup>6</sup>, Kunst H<sup>7</sup>, Mandelbaum M<sup>8</sup>, Pickett E<sup>9</sup>, Story A<sup>10,11</sup>, Vidal N<sup>6</sup>, Wurie F<sup>3,12</sup>, Lipman  
7 M<sup>4,9</sup>

- 8  
9  
10  
11  
12  
13  
14  
15  
16  
17  
18  
19  
20  
21  
22  
23  
24  
25  
26  
27  
28  
29  
30  
31  
32  
33  
34  
35  
36  
37  
38  
39  
40  
41  
42  
43  
44  
45  
46  
47  
48  
49  
50  
51  
52  
53  
54  
55  
56  
57  
58  
59  
60
1. Usher Institute of Population Health Sciences and Informatics, The University of Edinburgh, MacKenzie House, 30 West Richmond Street, Edinburgh, EH8 9DX, UK
  2. Institute for Global Health, University College London, 4th floor, Mortimer Market Centre, off Capper Street, London, WC1E 6JB, UK
  3. TB Unit, National Infection Service, Public Health England, 61 Colindale Avenue, London NW9 5EQ, UK
  4. UCL Respiratory, Division of Medicine, University College London, London, UK
  5. Centre for Behavioural Medicine, UCL School of Pharmacy, Mezzanine Floor, BMA House, Tavistock Square, London, WC1H 9JP, UK
  6. Institute for Global Health and Development, Queen Margaret University, Musselburgh, East Lothian, Edinburgh, EH21 6UU, UK
  7. Blizard Institute, Barts and The London School of Medicine and Dentistry, Queen Mary University of London, London, E1 2AT, UK
  8. TB Alert, Community Base, 113 Queens Road, Brighton, BN1 3XG, UK
  9. Department of Respiratory Medicine, Royal Free London NHS Foundation Trust, Pond Street, London, NW3 2QG, UK
  10. Collaborative Centre for Inclusion Health, University College London, London, UK
  11. Find & Treat, University College London Hospitals NHS Foundation Trust, 235 Euston Road, London, NW1 2BU, UK
  12. Department of Epidemiology and Public Health, Institute of Epidemiology and Health Care, University College London, UK

31 **Corresponding author:** Marc Lipman, Department of Respiratory Medicine, Royal Free London NHS  
32 Foundation Trust, Pond Street, London, NW3 2QG, UK; [marclipman@nhs.net](mailto:marclipman@nhs.net)

33  
34 **Word Count:** 4,327

35  
36 **Key words:** tuberculosis, medication adherence, manuals, protocol, pilot studies

**Abstract****Introduction**

Compared to the rest of the UK and Western Europe, England has high rates of the infectious disease tuberculosis (TB). TB is curable, although treatment is for at least six months - and longer when disease is drug resistant. If patients miss too many doses (non-adherence), they may transmit infection for longer and the infecting bacteria may develop resistance to the standard drugs used for treatment. Non-adherence may therefore risk both their health and that of others. Within England, certain population groups are thought to be at higher risk of non-adherence, but the factors contributing to this have been insufficiently determined, as have the best interventions to promote adherence. The objective of this study is to develop a manualised package of interventions for use as part of routine care within National Health Services to address the social and cultural factors that lead to poor adherence to treatment for TB disease.

50

**Methods and analysis**

This study uses a mixed methods approach, with six study components. These are: (i) scoping reviews of the literature, (ii) qualitative research with patients, carers and healthcare professionals, (iii) development of the intervention, (iv) a pilot randomised controlled trial of the manualised intervention, (v) a process evaluation to examine clinical utility, and (vi) a cost analysis.

56

**Ethics and dissemination**

This study received ethics approval on 24<sup>th</sup> December 2018 from Camberwell St. Giles Ethics Committee, UK (REC reference 18/LO/1818). Findings will be published and disseminated through peer-reviewed publications and conference presentations, published in an end of study report to our funder (the National Institute for Health Research, UK), and presented to key stakeholders.

62

**Trial Registration Number**

ISRCTN 95243114

65

## 66 **Article Summary: Strengths and limitations of this study**

### 67 **Strengths**

- 68 • Patient-centred, mixed methods approach, based on a robust understanding of the evidence  
69 on social, cultural and personal factors that influence adherence to medication to treat  
70 tuberculosis.
- 71 • Evidence and experience of adherence captured from a variety of perspectives from across  
72 the UK, including patients, their carers, and healthcare workers.
- 73 • Generalisable patient population of individuals at risk of non-adherence across low  
74 tuberculosis (TB) incidence settings.
- 75 • Development of a pragmatic and easy-to-use tool that captures the best evidence on  
76 adherence and allows its application in the clinic setting.

77

### 78 **Limitations**

- 79 • The study culminates in a pilot trial of the manualised intervention; a larger subsequent  
80 definitive trial is needed to test whether the intervention is efficacious and cost-effective  
81 beyond any initial conclusions regarding validity and feasibility derived from the pilot.

82

83

## 84 Introduction

85  
86 Against a background of rising tuberculosis (TB) in the 1990s and 2000s, the need for a  
87 comprehensive approach to TB control in England was deemed necessary by Public Health England  
88 (PHE) and the National Health Service (NHS) England. In January 2015, these bodies jointly launched  
89 the 'Collaborative Tuberculosis Strategy for England 2015-2020'[1]. This seeks to reduce TB  
90 incidence, decrease health inequalities, and ultimately contribute to international efforts to  
91 eliminate TB as a public health problem. Ensuring that people can take all of their medication as  
92 prescribed is one of the strategy's priorities, as poor adherence to treatment for TB is a driver of  
93 worse patient outcomes[2–9], increases the risk of transmission (due to delayed sputum culture  
94 conversion)[10], and can promote the development of drug resistance[3,11–16]. Subsequent  
95 National Institute for Health and Care Excellence (NICE) guidance noted the lack of robust TB  
96 research in this area[17].

97  
98 Barriers to optimal adherence to treatment for TB may occur for a number of reasons. These  
99 include:

- 100 • patient-related factors, including perceptions and beliefs,
- 101 • cultural influences and current mental state,
- 102 • structural economic factors and social support networks,
- 103 • health service factors that include treatment complexity as well as accessibility of those  
104 services and the relationships patients develop with service providers[18,19].

105  
106 Non-adherence is not a single issue and may take various forms e.g. suboptimal implementation  
107 (skipping doses), or stopping treatment early (for example, as soon as a patient feels better; this is  
108 discontinuation)[20].

109  
110 Although a series of studies have been undertaken to define the population groups most at risk of  
111 non-adherence[19], it is currently difficult, prior to starting medication, to identify who may struggle  
112 with taking treatment as prescribed. To date, methods to support treatment address some, but not  
113 all, of the important underlying reasons for poor adherence. For example, the World Health  
114 Organization's recent focus on digital technologies reflects our attention on individual-level  
115 determinants of adherence and reminder/observation-based systems[21]; far less research has  
116 addressed the social and structural barriers to staying on TB treatment.

117  
118 In the UK, the development of an intervention to support adherence to treatment that is sensitive to  
119 the individual's cultural background and social circumstances, and can be routinely delivered within  
120 the NHS, is critical. To this purpose, a mixed-methods, patient-centred, approach to the study of the  
121 (modifiable factors that influence patients' adherence to treatment for TB is required.

## 122 Methods and analysis

### 123 Research question

124  
125 Can a manualised package of intervention be developed to help overcome the social and cultural  
126 factors that lead to poor adherence to treatment in NHS patients in the United Kingdom with active  
127 TB?  
128

### 129 Aim

130  
131 To develop, pilot, and evaluate process and interim outcomes for an effective manualised  
132 intervention that improves the likelihood of adherence to treatment among NHS patients at risk of  
133 poor adherence due to social, cultural, and structural factors.

## Objectives

- 1) Synthesise current knowledge on (a) determinants of adherence to treatment for TB, and (b) interventions that can support adherence, with particular emphasis on social and cultural barriers. (Scoping Review and Conceptual Framework)
- 2) Apply a conceptual framework of adherence endorsed by NICE guidelines (the Perceptions and Practicalities (PAPA) approach [18] to elucidate and address the personal, socio-cultural, and health systems context, mechanisms, and pathways of poor adherence among NHS patients with TB. (Formative Research)
- 3) Develop a manualised intervention (a series of systematic actions applied on the basis of a patient's needs assessment) with multiple components that can identify (a) NHS patients most at risk of non-adherence, (b) the salient modifiable barriers, and (c) the tailored support mechanisms required to meet individual patient needs by matching appropriate interventions to specific barriers, as recommended by NICE. (Development of Intervention)  
A manualised intervention was considered to be a suitable approach to managing adherence in TB, as it will enable a set of measures to be applied consistently within different NHS settings that will aid both clinicians and patients throughout the treatment journey. The content of the intervention will use existing support measures, employed in a systematic and structured way, and may also include any new interventions that are developed in response to the formative research. Pilot the intervention package in people at risk of poor adherence to define how the components work in combination and separately. (Pilot Study)
- 4) Evaluate the process of implementation of this intervention through describing the challenges and facilitators in delivering the package as intended (fidelity, reach) and assessing the impact of the intervention through evaluation of adherence indicators. (Process Evaluation)
- 5) Use the findings of the pilot to assess the costs of delivering the manualised intervention in an NHS setting, and to guide development of a proposal for a full randomised controlled trial (RCT).

## Study design

This study uses a mixed methods approach. There are six sub-sections, reflecting the six objectives: i) Scoping Review and Conceptual Framework, ii) Formative Research, iii) Development of Intervention, iv) Pilot Study, v) Process Evaluation, vi) Cost Analysis and Future Work. Although the different elements are described separately below, the research activities for each will overlap, and some will run concurrently. The full programme of work and relationships between subsections is shown in Figure 1.

### i. Scoping Review

To underpin the development of the manualised intervention, the first study sub-section will undertake literature reviews to answer the following research questions:

- i) What personal, social, cultural, health systems-related and structural factors affect individuals' ability to adhere to treatment for TB?
- ii) What kinds of intervention have been developed to address the multiple levels (personal, social, cultural, systems and structural) at which barriers to adherence may operate?
- iii) What is the evidence for the successful impact of interventions to address barriers to adherence to treatment for TB?

These questions will be answered through the three following reviews:



1  
2  
3 185  
4 186 **1) A scoping review of qualitative studies** that examine the personal, social, cultural, health  
5 187 systems-related and structural factors affecting adherence to treatment for TB from the  
6 188 perspectives of adult patients, care givers, or health care providers, as well as studies that evaluate  
7 189 interventions to support adherence to treatment for TB. Data from all settings will be considered,  
8 190 but with a particular focus on low incidence, high income, settings.

9 191  
10 192 **2) A critical review of quantitative studies** examining the personal, social, cultural, health systems-  
11 193 related and structural factors affecting adherence to treatment for TB. This review focuses on low  
12 194 incidence, high income, settings and observational study designs. Given the scoping nature of the  
13 195 review, findings will be descriptively analysed and not be stratified or disaggregated e.g. by site of  
14 196 disease. All relative and absolute measures of effect will be extracted.

15 197  
16 198 **3) A critical review of quantitative studies that have examined the effectiveness of interventions**  
17 199 **to improve adherence in people taking treatment for TB**, building on existing systematic reviews,  
18 200 including the provision and delivery of information and/or education; enablers and/or incentives;  
19 201 social support; case management approaches. Given the more limited literature, both observational  
20 202 studies and clinical trials will be included, from all settings. Findings will be descriptively analysed.

21 203  
22 204 Together, these three reviews will enable us to conduct a critical interpretive synthesis of findings  
23 205 from qualitative and quantitative studies examining the assumptions and mechanisms of effect  
24 206 underlying interventions to improve adherence to treatment for TB.

## 25 207 26 208 **ii. Formative Research**

### 27 209 28 210 **Formative research methods, recruitment and eligibility**

29 211  
30 212 In line with findings from the scoping review, we will develop topic guides for qualitative interviews  
31 213 exploring current models of TB service delivery in the study sites, providers' views on the barriers  
32 214 and facilitators for treatment adherence, and TB patients' and their family members' experiences of  
33 215 starting and staying on treatment. The thematic analysis of these interviews will complement  
34 216 insights gained from the scoping reviews which will allow us to refine a conceptual framework of  
35 217 adherence building on the Perceptions and Practicalities Approach (PAPA) [18]. Approximately 60  
36 218 participants will be enrolled.

37 219  
38 220 Adults (aged 18 and over) who are currently taking or recently completed treatment will be  
39 221 identified by the local TB service at four UK sites (Edinburgh, London [Central London & East London]  
40 222 and Southampton) and asked to take part in the study. The services have been chosen for their  
41 223 patient diversity, geographic spread and as reflecting the national TB picture. The patient group will  
42 224 be enriched with people who have been poorly adherent to treatment, although we will also include  
43 225 patients who report full adherence so that we can capture what may have enabled them to take  
44 226 treatment as prescribed. With patient consent, family members and/or carers will also be  
45 227 approached and asked to participate.

46 228  
47 229 Health and social care workers from both primary and secondary care settings will be directly  
48 230 approached by researchers and invited to be interviewed. All those approached will be aged 18 or  
49 231 over and involved in TB management and care.

### 50 232 51 233 **Data collection methods**

52 234  
53 235 Three different methods of data collection will be used to undertake the formative research.

236

**1) In-depth interviews – patients and family members/carers**

These will be conducted as individual interviews with approximately 30 participants, using a topic guide. The areas to be explored are: self-perception; personal beliefs and practices related to medicine-taking; health literacy and health-seeking behaviour; social support; cultural norms around health-seeking behaviour; financial and other structural barriers.

242

**2) Testing of BMQ and BIPQ Questionnaires with patients for their suitability**

To ensure that the validated questionnaires (i.e. Beliefs about Medicines Questionnaires[22] and the Brief Illness Perception Questionnaire[23], are accessible and acceptable to patients, we will also conduct cognitive interviews with 10 patients. We will then have confidence to use them in the later pilot study to assess patient perceptions and practicalities affecting adherence to anti-TB therapy. These will explore self-perception; personal beliefs; and practices related to medicine-taking.

249

**3) Semi-structured Interviews – healthcare providers**

These will be undertaken with health care providers responsible for multiple aspects of TB care (doctors, nurses, social workers, directly observed therapy [DOT] providers, managers and administrators). They will focus on providers' perceptions of factors affecting patient understanding of TB and its treatment; service delivery models including staffing; organisation of care; communication. We will interview four to six providers at each site, aiming for a total of 20 interviews.

257

We will use a framework approach [24] to facilitate initial analysis of the interview transcripts. Short patient case studies will be created for each patient interview. Data on health systems issues gained through mapping patient pathways and provider interviews will be organised using a deductive approach, with appropriate visual pathways.

262

**iii. Development of the manualised intervention**

264

**Intervention development process**

The data collected from the scoping reviews and formative research will be presented to, and synthesised by, an Intervention Development Group (IDG). A manualised intervention will be developed to identify (a) NHS patients most at risk of non-adherence, (b) their salient modifiable barriers, and (c) the tailored support mechanisms that meet individual patient needs by matching appropriate interventions to these specific barriers.

271

The IDG will include:

273

- patients (in particular the homeless, ethnic minorities, migrants new to the UK, and patients with drug resistant TB)

274

- family members/significant others of affected persons

275

- members of the public

276

- health care professionals (from both primary and secondary care)

277

- other professionals who work with patients/communities affected by TB

278

279

The constitution of the IDG will enable a co-production approach to ensure that the intervention is pragmatic, can be delivered within the context of existing care pathways, and is of benefit to service users and those who are likely to access the intervention.

280

281

282

283

284

285

286

**Intervention contents**

The manualised intervention is likely to consist of a screening and assessment tool, in addition to a package of measures that can be tailored to the needs of individual patients from different

1  
2  
3 287 population groups.

4 288

5 289 As patterns of adherence may be irregular over time, it is intended that the manualised intervention  
6 290 will be administered to all patients at each patient review. The tool thus needs to be quick and easy  
7 291 to administer. It may be electronically linked to patient records, enabling a comprehensive picture of  
8 292 the risk of possible non-adherence to be developed for each patient, as well as within a clinic  
9 293 population. The various delivery options for the intervention (such as using paper or an app) will be  
10 294 considered during its development stage.

11 295

12 296 The menu of supportive measures may, for example, include:

13 297

- 14 297 • Informational intervention: e.g. providing a convincing story setting out the rationale and  
15 298 on-going need for medication, addressing concerns about potential adverse effects and  
16 299 consequences of treatment and what to do if such events occur e.g. the participant will be  
17 300 informed that it is possible to change their treatment regimens to alternatives[25].
- 18 301 • Practicalities and Capability based interventions: video observed therapy [VOT], DOT,  
19 302 reminders including text messaging, automated methods for monitoring and feedback  
20 303 including electronic dosette boxes, use of a medication app, incentives e.g. financial and  
21 304 food vouchers, mitigation and management of drug toxicity due to treatments.
- 22 305 • Social and system interventions: offering flexibility in appointments; enhanced guidance on  
23 306 'navigating' clinic pathways; signposting patients to relevant services, e.g. housing, drug and  
24 307 alcohol services, and social care; providing peer-support.

25 308

#### 26 309 **iv. Piloting the intervention**

27 310

##### 28 311 **Study design, recruitment and eligibility**

29 312 Once the intervention is developed, proof-of-concept is required within the real world. This will be  
30 313 undertaken using a cluster randomised pilot study that compares the manualised intervention to the  
31 314 usual standard of care in four London clinics treating TB. Two clinics will be randomly allocated to  
32 315 the intervention and two to standard of care. In the latter, the amount of support provided to  
33 316 patients is based on perceived need, as identified by a nurse-led review and a needs assessment.  
34 317 Most patients will have supported self-administered therapy, whilst others will be offered DOT  
35 318 and/or VOT if this is felt to be appropriate.

36 319

37 320 All consecutive patients aged 18 or over who are about to start treatment for TB, irrespective of site  
38 321 of disease, will be approached to take part in the study. We will exclude individuals who are unable  
39 322 to provide informed consent, those already on treatment and those who are not expected to live for  
40 323 the duration of the study (a minimum of six months from starting treatment). Within the pilot study,  
41 324 it is essential to capture the entire treatment period for each patient, in order to assess the  
42 325 effectiveness of the intervention. . Due to the nature of the TB patient population in the UK, patients  
43 326 are likely to include people at greater risk of poor adherence such as migrants newly arrived in the  
44 327 UK, people whose first language is not English, people with a mental health disorder, people taking  
45 328 immunosuppressive therapy or known to have immunodeficiency, those with a previous history of  
46 329 treatment for TB, or poor-adherence with anti-TB medication, and people with a current or previous  
47 330 history of drug or alcohol misuse.

48 331

49 332 The purpose of the pilot study is not formal hypothesis testing. Given this, a target sample size of 80  
50 333 patients enrolled (20 per site) was identified for the pilot study as providing useful information that  
51 334 can help determine whether the intervention will be deliverable within a clinical setting. It will also  
52 335 guide the development of a possible larger definitive study using the intervention. The four TB clinics  
53 336 of interest (in East and North London) each treat in excess of 60 relevant patients per annum.

54 337

1  
2  
3 338 Based on usage of DOT within the clinic populations seen at the treatment sites (i.e. individuals  
4 339 currently identified as needing adherence support), we estimate that around 33% of patients will be  
5 340 at risk of non-adherence. Taking this as a minimum (as the manualised intervention is likely to be  
6 341 more sensitive than current risk assessments), we would expect that at least 26 of the 80 patients  
7 342 recruited will be identified as requiring adherence support. This sample size allows us to measure  
8 343 consent to enrolment for 80 individuals, data completeness for adherence and treatment outcomes  
9 344 for 80 individuals, data on acceptability and feasibility of the intervention package for around 40  
10 345 individuals, and data on acceptability and feasibility of adherence support for at least 26 individuals  
11 346 (13 receiving the manualised intervention and 13 standard care).  
12 347

13  
14 348 **Outcomes of the pilot** The primary outcome of the study will be level of adherence, measured as  
15 349 the proportion of prescribed doses taken and assessed at six months from the start of treatment. In  
16 350 addition to this primary outcome, a number of secondary outcomes will also be measured, as  
17 351 follows:  
18 352

- 19 353 1) Proportion consenting to the study.
- 20 354 2) Completeness of data for measures of adherence.
- 21 355 3) Proportion of patients withdrawing during the study and the reasons why.
- 22 356 4) Proportion of patients identified as needing adherence support in the intervention arm.
- 23 357 5) Proportion of patients offered adherence support and accepting it in the intervention arm.
- 24 358 6) Documentation of which adherence-promoting activities have been implemented among  
25 359 patients both in the standard of care and intervention arm, and when.
- 26 360 7) Detailed treatment implementation information: e.g. proportion of patients completing  
27 361 treatment, proportion of patients still on treatment after nine months or at study  
28 362 completion (whichever is the earlier).
- 29 363 8) Patterns of adherence (implementation and discontinuation).
- 30 364 9) Impact of manualised intervention on maintaining adherence over the duration of  
31 365 treatment.
- 32 366 10) Process variables – adherence-related perceptions and practicalities.

### 33 367 34 368 **Measures of adherence**

35 369 Our primary measure of adherence will be data obtained from medication monitoring boxes [26].  
36 370 The boxes will not be set up act as a reminder system. Other measures will also be used and  
37 371 compared with this. These will include pill counts (the remaining medication in the box at the end of  
38 372 each month), and also patient-reported adherence, where we will ask patients to estimate how  
39 373 many doses they have missed in the last month. In the case of DOT or VOT methods being used, a  
40 374 record of missed doses will be kept.  
41 375

### 42 376 **Administration of the manualised intervention**

43 377 The patient's case manager (usually the TB clinic nurse), plus a study research nurse, will apply the  
44 378 intervention in partnership with the patient to identify whether personal, socio-cultural and/or  
45 379 systems risk factors are present that suggest likely poor adherence with treatment. If these are  
46 380 identified, then the relevant measures outlined in the manualised intervention that may mitigate  
47 381 these will be reviewed and implemented with the agreement of the participant. These will be  
48 382 continued throughout the course of treatment, or stopped if no longer deemed to be relevant or  
49 383 required on reassessment.  
50 384

### 51 385 **Study schedule of visits**

52 386 Study subjects will be seen at weeks 0, 2, 4, 8, 12, 16, 20 and 24 (earliest date of treatment  
53 387 completion). Should they require on-going treatment after six months, they will be seen as clinically  
54 388 indicated. At each review, adherence assessments will be performed in addition to an assessment of  
55  
56  
57  
58  
59  
60

1  
2  
3 389 perceptions and practicalities, the completion of the BMQ and the EQ-5D-5L Quality of Life  
4 390 questionnaires [22,27] and the GAD-7 [28] and PHQ-9[29] to assess anxiety and depression. The  
5 391 manualised intervention will be applied if the patient is attending a clinic that has been randomised  
6 392 to the intervention arm. All data will be collected by the research nurse, using standardised forms.  
7 393

#### 8 394 **Follow Up**

9 395 Most patients who do not have clinically important drug resistant disease receive six months of  
10 396 treatment. To allow for treatment interruptions, patients within the pilot study will be followed to  
11 397 either treatment completion or for a total of nine months from starting anti-TB therapy.  
12 398

#### 13 399 **Analysis and interpretation**

14 400 Where possible, univariable analyses will be undertaken to compare each outcome measure listed  
15 401 between study arms (intervention and control). For the primary outcome (adherence) the mean  
16 402 percentage value will be reported by arm (intervention and control) and histograms used to describe  
17 403 the distribution of values by study arm. Binary secondary outcomes will be reported by the  
18 404 proportion of individuals achieving this within each arm. The need to adjust for clustering by site and  
19 405 clinical care provider will be assessed using the cluster summary method (a t-test to compare the  
20 406 cluster means or proportions [as appropriate, two values per arm] between arms). An assessment of  
21 407 the balance in baseline characteristics between the study arms will also be conducted. If  
22 408 randomisation has failed to evenly distribute key characteristics (e.g. age, sex, ethnicity, or other  
23 409 factors identified as important during the scoping reviews), then the cluster means or proportions  
24 410 will be adjusted for these differences before applying the t-test. This two-stage approach to analysis  
25 411 is described by Hayes and Moulton [30]. We recognise that adherence data may be highly skewed  
26 412 and thus require compensatory analytical approaches.

27 413 The analysis of the first three of our secondary outcomes will address the feasibility of a definitive  
28 414 trial following a similar design to the pilot. Analysis of secondary outcomes four to six addresses the  
29 415 intervention, and complements the process evaluation (see below). Analysis of the primary outcome  
30 416 and final secondary outcomes around treatment adherence and completion provides initial  
31 417 information - given the modest sample size - concerning the effectiveness of the intervention, and  
32 418 may assist the sample size calculation for the definitive trial. They can also offer an alert in the  
33 419 unlikely event that the intervention is harmful.  
34 420

#### 35 421 **Power calculation**

36 422 Although we are undertaking a pilot study and thus the numbers enrolled are small, Table 1  
37 423 indicates the power of our primary analysis to detect a range of absolute increases in adherence (10-  
38 424 30%) from a variety of baseline values (50-90%).  
39 425  
40 426



**Table 1- Power calculation for the pilot study**

Given a sample size of 80 individuals (40 per arm), across a range of baseline levels of adherence and absolute increases in that level, the pilot study has the following power.

| Baseline adherence | Absolute increase | Power |
|--------------------|-------------------|-------|
| 70                 | 30                | 0.98  |
| 60                 | 30                | 0.88  |
| 50                 | 30                | 0.82  |
| 80                 | 20                | 0.86  |
| 70                 | 20                | 0.61  |
| 60                 | 20                | 0.49  |
| 90                 | 10                | 0.54  |
| 80                 | 10                | 0.24  |
| 70                 | 10                | 0.18  |

## v. Process evaluation

### Evaluation method

We will evaluate the implementation process by analysing the challenges and facilitators in delivering the package. The impact of the intervention will be assessed by evaluation of adherence indicators. We will use the findings of the pilot to assess the costs of delivering the manualised intervention in an NHS setting, and to guide development of a proposal for a full RCT.

The process evaluation will consist of a description of the process of intervention implementation. It will assess how well the manualised intervention achieves its intended aim compared to standard care.

We will consider:

- 1) The fidelity of the intervention as delivered in comparison to how it was designed and envisaged,
- 2) The reach of the intervention (the proportion of the target group receiving it),
- 3) The barriers to facilitating implementation of the intervention and how these can be addressed,
- 4) The pre-existing factors that facilitated implementation.

### Process measures, recruitment and eligibility

Process measures for each element of the package will be developed once the manual development has been completed, and used to assess success. They will include acceptability, uptake and change in practice. We will work with patients and staff separately at all four London sites. We will interview 20 patients (five at each study site i.e. 10 from each arm); and, if possible, 20 health care workers (five at each site). The patients will be selected within each site using purposeful sampling of clinic lists of every patient with active TB, to enable us to reflect the demographic spread of patients.

Key outputs will include a qualitative evaluation of delivery, the development of a narrative description of the process of intervention implementation and maintenance and a quantitative assessment of adherence-related perceptions and practicalities within intervention and control groups.

We will invite participation in the process evaluation from patients enrolled in the pilot study or staff

1  
2  
3 478 members treating patients at one of the four London sites also involved in delivering the pilot study.  
4 479 They will be included if they are aged 18 or over and able to provide informed consent. This will  
5 480 include probing anticipated versus real-life delivery of the intervention.  
6 481

## 8 482 **vi. Cost Analysis and Future Work**

9 483  
10 484 In order to generate realistic estimates of the cost of the intervention, cost data from the NHS  
11 485 perspective will be collected during the pilot study using a cost data collection tool used by health  
12 486 economists (The Client Service Receipt Inventory, CSRI), modified for TB [31].  
13 487

14 488 After the pilot study and process evaluation have been completed, a final intervention package will  
15 489 be designed for use in a definitive RCT of the manualised package of interventions. The design of this  
16 490 final package will be based on the results of the process evaluation and the experience gained during  
17 491 the piloting of the intervention, modifying the definitive trial design and/or data collection  
18 492 accordingly.  
19 493

## 21 494 **Patient and public engagement**

22 495 As documented above, patient representatives will sit on the IDG for the study. In addition, TB Alert,  
23 496 the UK's only national TB charity, has membership of the IDG. The role of the IDG, which will meet  
24 497 regularly throughout the study, is described in section iii. At the end of the study, the IDG will be  
25 498 involved in commenting on the findings and contributing to the dissemination plan.  
26 499

## 29 500 **Ethics and dissemination**

30 501 This study received ethics approval on 24<sup>th</sup> December 2018 from Camberwell St Giles Ethics  
31 502 Committee (REC reference 18/LO/1818). Findings will be published and disseminated through peer-  
32 503 reviewed publications and conference presentations, published in an end of study report to our  
33 504 funder (the National Institute for Health Research, UK), and presented to key stakeholders.  
34 505

## 36 506 **Conclusion**

37 507  
38 508 Our study will develop and pilot a manualised intervention to improve adherence to treatment for  
39 509 TB in the UK using a mixed methods, patient-centred and provider-informed approach. This will  
40 510 enable us to begin to understand what motivates patients' treatment behaviour, whilst ensuring  
41 511 deliverability within the NHS. Our work is based on a robust understanding of the evidence on social,  
42 512 cultural and personal factors that influence adherence, and the interventions that are most effective  
43 513 in addressing these. The study reflects the geographic spread of TB in the UK and captures not only  
44 514 patient and expert clinical and academic experience, but also that of family and carers to develop  
45 515 the intervention. A key feature of the study is the co-production of a pragmatic and easy-to-use tool  
46 516 that utilises the best evidence on adherence, and allows its application in the clinic setting in a  
47 517 dynamic and iterative way.  
48 518

49 519 Although the final pilot study may be limited to a relatively small sample size, it is hoped that its  
50 520 broad patient-centred perspective will make a useful contribution to our understanding of, and  
51 521 ability to deal effectively with, the risks of non-adherence to TB treatment in a population that can  
52 522 find this challenging. As many of the factors influencing adherence are likely to be generalisable to  
53 523 patients with other conditions in both high and low resource settings, this study also has the  
54 524 potential to inform adherence interventions in other disease areas.  
55 525  
56 526

### 527 **Authors' contributions**

528 ML, IA, RH, KK and HRS conceived of the work. HRS, IA, AC, RH, KK, MM, AS, NV, FW, HK, EP and ML  
529 designed the work. HRS, CNJC, MD, RH, KK, drafted the manuscript. All authors critically revised the  
530 manuscript and gave final approval of the version of the protocol manuscript to be published. All  
531 authors agree to be accountable for all aspects of the work in ensuring that questions related to the  
532 accuracy or integrity of any part are appropriately investigated and resolved.

### 534 **Funding statement**

535 This work was supported by the National Institute for Health Research (NIHR) Health Technology  
536 Assessment Programme, UK grant number 16/88/06.

537  
538 The views expressed are those of the author(s) and not necessarily those of the National Health  
539 Service, UK, the NIHR or the Department of Health and Social Care.

540  
541 This is an abridged version of the full study protocol, which can be accessed at  
542 <https://www.fundingawards.nihr.ac.uk/award/16/88/06>

### 544 **Competing interests statement**

545 IA, MD, HK, KK, ML, MM, EP, AS, FW have no competing interests to declare.

546  
547 RH is supported by the National Institute for Health Research (NIHR, Collaboration for Leadership in  
548 Applied Health Research and Care (CLAHRC), North Thames at Bart's Health NHS Trust and Asthma  
549 UK (AUKCAR). Speaker engagements with honoraria with the following companies: Abbvie, Amgen,  
550 Astellas, AstraZeneca, Biogen, Erasmus, Idec, Gilead Sciences, GlaxoSmithKline, Janssen, Merck  
551 Sharp Dohme, Novartis, Pfizer, Roche, Shire Pharmaceuticals and TEVA. RH is Founding Director of a  
552 UCL-Business spin-out company (Spoonful of Sugar Ltd) providing consultancy on treatment  
553 engagement and patient support programmes to healthcare policy makers, providers and industry.

554  
555 HRS reports grants from Medical Research Council (MRC), UK, grants from National Institute for  
556 Health Research (NIHR), UK, during the conduct of the study; other from Korean CDC and Johnson  
557 and Johnson (makers of Bedaquiline), other from Latvian Society Against Tuberculosis (funding  
558 through Otsuka and Johnson and Johnson), outside the submitted work.

559  
560 CNJC reports personal fees from Public Health England, outside the submitted work.



561 **References**

- 562
- 563 1 Public Health England. Collaborative Tuberculosis Strategy for England 2015 to 2020. London:  
564 2015. [https://www.gov.uk/government/publications/collaborative-tuberculosis-strategy-for-](https://www.gov.uk/government/publications/collaborative-tuberculosis-strategy-for-england)  
565 [england](https://www.gov.uk/government/publications/collaborative-tuberculosis-strategy-for-england)
- 566 2 Imperial MZ, Nahid P, Phillips PPJ, *et al.* A patient-level pooled analysis of treatment-shortening  
567 regimens for drug-susceptible pulmonary tuberculosis. *Nat Med* 2018;**24**:1708–15.  
568 doi:10.1038/s41591-018-0224-2
- 569 3 Kayigamba FR, Bakker MI, Mugisha V, *et al.* Adherence to Tuberculosis Treatment, Sputum  
570 Smear Conversion and Mortality: A Retrospective Cohort Study in 48 Rwandan Clinics. *PLoS*  
571 *One* 2013;**8**:e73501. doi:10.1371/journal.pone.0073501
- 572 4 Thomas A, Gopi PG, Santha T, *et al.* Predictors of relapse among pulmonary tuberculosis  
573 patients treated in a DOTS programme in South India. *Int J Tuberc Lung Dis* 2005;**9**:556–  
574 61.<http://www.ncbi.nlm.nih.gov/pubmed/15875929> (accessed 1 May 2019).
- 575 5 Valencia S, León M, Losada I, *et al.* How do we measure adherence to anti-tuberculosis  
576 treatment? 2017;**15**:157–65. doi:10.1080/14787210.2017.1264270
- 577 6 van den Boogaard J, Boeree MJ, Kibiki GS, *et al.* The complexity of the adherence-response  
578 relationship in tuberculosis treatment: why are we still in the dark and how can we get out?  
579 *Trop Med Int Health* 2011;**16**:693–8. doi:10.1111/j.1365-3156.2011.02755.x
- 580 7 Zhdanov V, Bilenko N, Mor Z. Risk Factors for Recurrent Tuberculosis among Successfully  
581 Treated Patients in Israel, 1999-2011. *Isr Med Assoc J* 2017;**19**:237–  
582 41.<http://www.ncbi.nlm.nih.gov/pubmed/28480678> (accessed 1 May 2019).
- 583 8 Bastard M, Sanchez-Padilla E, Hewison C, *et al.* Effects of treatment interruption patterns on  
584 treatment success among patients with multidrug-resistant tuberculosis in Armenia and  
585 Abkhazia. *J Infect Dis* 2015;**211**:1607–15. doi:10.1093/infdis/jiu551
- 586 9 Podewils LJ, Gler MTS, Quelapio MI, *et al.* Patterns of Treatment Interruption among Patients  
587 with Multidrug-Resistant TB (MDR TB) and Association with Interim and Final Treatment  
588 Outcomes. *PLoS One* 2013;**8**:e70064. doi:10.1371/journal.pone.0070064
- 589 10 Chirwa T, Nyasulu P, Chirwa E, *et al.* Levels of tuberculosis treatment adherence among sputum  
590 smear positive pulmonary tuberculosis patients attending care at Zomba Central hospital,  
591 southern Malawi, 2007-2008. *PLoS One* 2013;**8**:e63050. doi:10.1371/journal.pone.0063050
- 592 11 Arnold A, Cooke GS, Kon OM, *et al.* Drug resistant TB: UK multicentre study (DRUMS):  
593 Treatment, management and outcomes in London and West Midlands 2008–2014. *J Infect*  
594 2017;**74**:260–71. doi:10.1016/j.jinf.2016.12.005
- 595 12 Pritchard AJ, Hayward AC, Monk PN, *et al.* Risk factors for drug resistant tuberculosis in  
596 Leicestershire--poor adherence to treatment remains an important cause of resistance.  
597 *Epidemiol Infect* 2003;**130**:481–3.<http://www.ncbi.nlm.nih.gov/pubmed/12825732> (accessed  
598 30 Jan 2019).
- 599 13 Cadosch D, Abel Zur Wiesch P, Kouyos R, *et al.* The Role of Adherence and Retreatment in De  
600 Novo Emergence of MDR-TB. *PLoS Comput Biol* 2016;**12**:e1004749.  
601 doi:10.1371/journal.pcbi.1004749
- 602 14 Saunders NJ, Trivedi UH, Thomson ML, *et al.* Deep resequencing of serial sputum isolates of  
603 Mycobacterium tuberculosis during therapeutic failure due to poor compliance reveals  
604 stepwise mutation of key resistance genes on an otherwise stable genetic background. *J Infect*  
605 2011;**62**:212–7. doi:10.1016/j.jinf.2011.01.003
- 606 15 Shin SS, Keshavjee S, Gelmanova IY, *et al.* Development of Extensively Drug-resistant  
607 Tuberculosis during Multidrug-resistant Tuberculosis Treatment. *Am J Respir Crit Care Med*  
608 2010;**182**:426–32. doi:10.1164/rccm.200911-1768OC
- 609 16 Bradford WZ, Martin JN, Reingold AL, *et al.* The changing epidemiology of acquired drug-  
610 resistant tuberculosis in San Francisco, USA. *Lancet* 1996;**348**:928–31. doi:10.1016/S0140-  
611 6736(96)03027-9

- 1  
2  
3 612 17 NICE. NICE Guideline: Tuberculosis. Natl. Inst. Heal. Care Excell. 2016;:178.  
4 613 18 Horne R, Weinman J, Barber N, *et al.* Concordance, adherence and compliance in medicine  
5 614 taking. 2005. doi:10.1007/SpringerReference\_64584  
6 615 19 De Geest S, Sabaté E. Adherence to long-term therapies: Evidence for action. World Health  
7 616 Organization. Eur. J. Cardiovasc. Nurs. 2003. doi:10.1016/S1474-5151(03)00091-4  
8 617 20 Vrijens B, De Geest S, Hughes DA, *et al.* A new taxonomy for describing and defining adherence  
9 618 to medications. *Br J Clin Pharmacol* 2012;**73**:691–705. doi:10.1111/j.1365-2125.2012.04167.x  
10 619 21 World Health Organisation. *Handbook for the use of digital technologies to support tuberculosis*  
11 620 *medication adherence*. Geneva, Switzerland, Switzerland: 2017.  
12 621 https://www.who.int/tb/publications/2018/TB\_medication\_adherence\_handbook\_2018/en/  
13 622 22 Horne R, Weinman J, Hankins M. The beliefs about medicines questionnaire: The development  
14 623 and evaluation of a new method for assessing the cognitive representation of medication.  
15 624 *Psychol Heal* 1999;**14**:1–24. doi:10.1080/08870449908407311  
16 625 23 Broadbent E, Petrie KJ, Main J, *et al.* The Brief Illness Perception Questionnaire. *J Psychosom*  
17 626 *Res* 2006;**60**:631–7. doi:10.1016/j.jpsychores.2005.10.020  
18 627 24 Gale NK, Heath G, Cameron E, *et al.* Using the framework method for the analysis of qualitative  
19 628 data in multi-disciplinary health research. *BMC Med Res Methodol* 2013;**13**:117.  
20 629 doi:10.1186/1471-2288-13-117  
21 630 25 Michie S, van Stralen MM, West R. The behaviour change wheel: A new method for  
22 631 characterising and designing behaviour change interventions. *Implement Sci* 2011;**6**.  
23 632 doi:10.1186/1748-5908-6-42  
24 633 26 Lewis JJ, Liu X, Zhang Z, *et al.* Evaluation of a medication monitor-based treatment strategy for  
25 634 drug-sensitive tuberculosis patients in China: study protocol for a cluster randomised  
26 635 controlled trial. *Trials* 2018;**19**:398. doi:10.1186/s13063-018-2650-3  
27 636 27 Herdman M, Gudex C, Lloyd A, *et al.* Development and preliminary testing of the new five-level  
28 637 version of EQ-5D (EQ-5D-5L). *Qual Life Res* 2011;**20**:1727–36. doi:10.1007/s11136-011-9903-x  
29 638 28 Spitzer RL, Kroenke K, Williams JBW, *et al.* A Brief Measure for Assessing Generalized Anxiety  
30 639 Disorder. *Arch Intern Med* 2006;**166**:1092. doi:10.1001/archinte.166.10.1092  
31 640 29 Kroenke K, Spitzer RL, Williams JBW. The PHQ-9. *J Gen Intern Med* 2001;**16**:606–13.  
32 641 doi:10.1046/j.1525-1497.2001.016009606.x  
33 642 30 Hayes RJ, Moulton LH, Moulton LH. *Cluster Randomised Trials, Second Edition*. Chapman and  
34 643 Hall/CRC 2017. doi:10.4324/9781315370286  
35 644 31 Beecham J, Knapp M. 2 Costing psychiatric interventions. In: Graham, ed. *Measuring Mental*  
36 645 *Health Needs*. London: : Gaskell 2001. 200–24. http://www.rcpsych.ac.uk (accessed 12 Sep  
37 646 2019).  
38 647  
39 648  
40  
41  
42  
43  
44  
45  
46  
47  
48  
49  
50  
51  
52  
53  
54  
55  
56  
57  
58  
59  
60

1  
2  
3 649 **Figure legends**  
4

5 650

6 651 **Figure 1- The IMPACT study**

7 652 The six mixed-methods elements of the IMPACT [Intervening with a Manualised Package to Achieve  
8 653 treatment adherence in people with Tuberculosis] study and the relationships between them. The  
9 654 study is guided by a steering group, which has oversight over the entire process and culminates in a  
10 655 pilot study with associated evaluatory elements.  
11 656

12  
13  
14  
15  
16  
17  
18  
19  
20  
21  
22  
23  
24  
25  
26  
27  
28  
29  
30  
31  
32  
33  
34  
35  
36  
37  
38  
39  
40  
41  
42  
43  
44  
45  
46  
47  
48  
49  
50  
51  
52  
53  
54  
55  
56  
57  
58  
59  
60

For peer review only

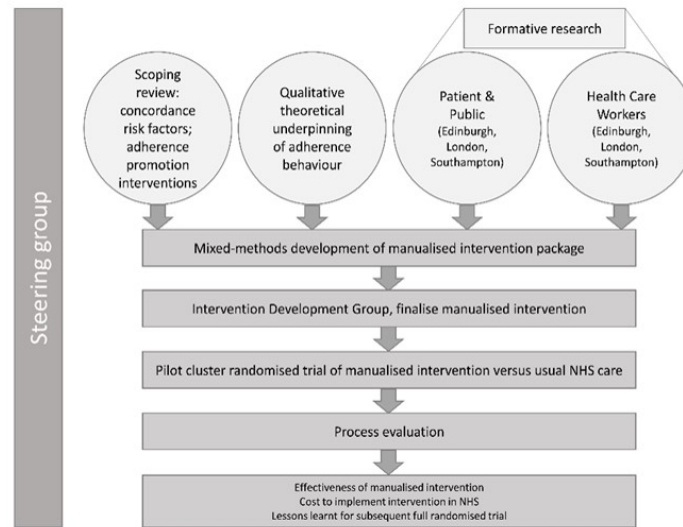

Figure 1- The IMPACT study

The six mixed-methods elements of the IMPACT [Intervening with a Manualised Package to Achieve treatment adherence in people with Tuberculosis] study and the relationships between them. The study is guided by a steering group, which has oversight over the entire process and culminates in a pilot study with associated evaluatory elements.

159x92mm (150 x 150 DPI)

# BMJ Open

## The IMPACT Study: Intervening with a Manualised Package to ACHieve treatment adherence in people with Tuberculosis. A protocol paper for a mixed methods study, including a pilot randomised controlled trial

|                                 |                                                                                                                                                                                                                                                                                                                                                                                                                                                                                                                                                                                                                                                                                                                                                                                                                                                                     |
|---------------------------------|---------------------------------------------------------------------------------------------------------------------------------------------------------------------------------------------------------------------------------------------------------------------------------------------------------------------------------------------------------------------------------------------------------------------------------------------------------------------------------------------------------------------------------------------------------------------------------------------------------------------------------------------------------------------------------------------------------------------------------------------------------------------------------------------------------------------------------------------------------------------|
| Journal:                        | <i>BMJ Open</i>                                                                                                                                                                                                                                                                                                                                                                                                                                                                                                                                                                                                                                                                                                                                                                                                                                                     |
| Manuscript ID                   | bmjopen-2019-032760.R2                                                                                                                                                                                                                                                                                                                                                                                                                                                                                                                                                                                                                                                                                                                                                                                                                                              |
| Article Type:                   | Protocol                                                                                                                                                                                                                                                                                                                                                                                                                                                                                                                                                                                                                                                                                                                                                                                                                                                            |
| Date Submitted by the Author:   | 10-Oct-2019                                                                                                                                                                                                                                                                                                                                                                                                                                                                                                                                                                                                                                                                                                                                                                                                                                                         |
| Complete List of Authors:       | Stagg, Helen R.; University of Edinburgh, Usher Institute<br>Abubakar, Ibrahim; University College London<br>Campbell, Colin; Public Health England, Tuberculosis Section, Centre for Infectious Disease Surveillance and Control, National Infection Service<br>Copas, Andrew; UCL<br>Darvell, Marcia; University College London<br>Horne, Robert; University College London<br>Kielmann, Karina; Queen Margaret University Edinburgh<br>Kunst, Heinke; Queen Mary University of London, Department of Respiratory Medicine<br>Mandelbaum, Mike; TB Alert<br>Pickett, Elisha; Royal Free London NHS Foundation Trust<br>Story, Alistair; University College Hospitals NHS Foundation Trust, Find&Treat<br>Vidal, Nicole; Queen Margaret University Edinburgh<br>Wurie, Fatima; University College London,<br>Lipman, Marc; Royal Free Campus, Respiratory Medicine |
| <b>Primary Subject Heading</b>: | Respiratory medicine                                                                                                                                                                                                                                                                                                                                                                                                                                                                                                                                                                                                                                                                                                                                                                                                                                                |
| Secondary Subject Heading:      | Patient-centred medicine, Infectious diseases, Epidemiology, Qualitative research                                                                                                                                                                                                                                                                                                                                                                                                                                                                                                                                                                                                                                                                                                                                                                                   |
| Keywords:                       | Tuberculosis < INFECTIOUS DISEASES, medication adherence, manuals, Protocols & guidelines < HEALTH SERVICES ADMINISTRATION & MANAGEMENT, pilot studies                                                                                                                                                                                                                                                                                                                                                                                                                                                                                                                                                                                                                                                                                                              |
|                                 |                                                                                                                                                                                                                                                                                                                                                                                                                                                                                                                                                                                                                                                                                                                                                                                                                                                                     |

SCHOLARONE™  
Manuscripts

1  
2  
3  
4  
5  
6  
7  
8  
9  
10  
11  
12  
13  
14  
15  
16  
17  
18  
19  
20  
21  
22  
23  
24  
25  
26  
27  
28  
29  
30  
31  
32  
33  
34  
35  
36  
37  
38  
39  
40  
41  
42  
43  
44  
45  
46  
47  
48  
49  
50  
51  
52  
53  
54  
55  
56  
57  
58  
59  
60

# 1 The IMPACT Study: Intervening with a Manualised Package to ACHieve 2 treatment adherence in people with Tuberculosis. A protocol paper for a 3 mixed methods study, including a pilot randomised controlled trial

4  
5 **Author list:** Stagg HR<sup>1</sup>, Abubakar I<sup>2</sup>, Campbell CNJ<sup>2,3</sup>, Copas A<sup>2</sup>, Darvell M<sup>4</sup>, Horne R<sup>5</sup>,  
6 Kielmann K<sup>6</sup>, Kunst H<sup>7</sup>, Mandelbaum M<sup>8</sup>, Pickett E<sup>9</sup>, Story A<sup>10,11</sup>, Vidal N<sup>6</sup>, Wurie F<sup>3,12</sup>, Lipman  
7 M<sup>4,9</sup>

- 8  
9  
10  
11  
12  
13  
14  
15  
16  
17  
18  
19  
20  
21  
22  
23  
24  
25  
26  
27  
28  
29  
30  
31  
32  
33  
34  
35  
36  
37  
38  
39  
40  
41  
42  
43  
44  
45  
46  
47  
48  
49  
50  
51  
52  
53  
54  
55  
56  
57  
58  
59  
60
1. Usher Institute of Population Health Sciences and Informatics, The University of Edinburgh, MacKenzie House, 30 West Richmond Street, Edinburgh, EH8 9DX, UK
  2. Institute for Global Health, University College London, 4th floor, Mortimer Market Centre, off Capper Street, London, WC1E 6JB, UK
  3. TB Unit, National Infection Service, Public Health England, 61 Colindale Avenue, London NW9 5EQ, UK
  4. UCL Respiratory, Division of Medicine, University College London, London, UK
  5. Centre for Behavioural Medicine, UCL School of Pharmacy, Mezzanine Floor, BMA House, Tavistock Square, London, WC1H 9JP, UK
  6. Institute for Global Health and Development, Queen Margaret University, Musselburgh, East Lothian, Edinburgh, EH21 6UU, UK
  7. Blizard Institute, Barts and The London School of Medicine and Dentistry, Queen Mary University of London, London, E1 2AT, UK
  8. TB Alert, Community Base, 113 Queens Road, Brighton, BN1 3XG, UK
  9. Department of Respiratory Medicine, Royal Free London NHS Foundation Trust, Pond Street, London, NW3 2QG, UK
  10. Collaborative Centre for Inclusion Health, University College London, London, UK
  11. Find & Treat, University College London Hospitals NHS Foundation Trust, 235 Euston Road, London, NW1 2BU, UK
  12. Department of Epidemiology and Public Health, Institute of Epidemiology and Health Care, University College London, UK

31 **Corresponding author:** Marc Lipman, Department of Respiratory Medicine, Royal Free London NHS  
32 Foundation Trust, Pond Street, London, NW3 2QG, UK; [marclipman@nhs.net](mailto:marclipman@nhs.net)

34 **Word Count:** 4,544

36 **Key words:** tuberculosis, medication adherence, manuals, protocol, pilot studies

## 38 **Abstract**

### 39 **Introduction**

40 Compared to the rest of the UK and Western Europe, England has high rates of the infectious  
41 disease tuberculosis (TB). TB is curable, although treatment is for at least six months - and longer  
42 when disease is drug resistant. If patients miss too many doses (non-adherence), they may transmit  
43 infection for longer and the infecting bacteria may develop resistance to the standard drugs used for  
44 treatment. Non-adherence may therefore risk both their health and that of others. Within England,  
45 certain population groups are thought to be at higher risk of non-adherence, but the factors  
46 contributing to this have been insufficiently determined, as have the best interventions to promote  
47 adherence. The objective of this study is to develop a manualised package of interventions for use as  
48 part of routine care within National Health Services to address the social and cultural factors that  
49 lead to poor adherence to treatment for TB disease.

50

### 51 **Methods and analysis**

52 This study uses a mixed methods approach, with six study components. These are: (i) scoping  
53 reviews of the literature, (ii) qualitative research with patients, carers and healthcare professionals,  
54 (iii) development of the intervention, (iv) a pilot randomised controlled trial of the manualised  
55 intervention, (v) a process evaluation to examine clinical utility, and (vi) a cost analysis.

56

### 57 **Ethics and dissemination**

58 This study received ethics approval on 24<sup>th</sup> December 2018 from Camberwell St. Giles Ethics  
59 Committee, UK (REC reference 18/LO/1818). Findings will be published and disseminated through  
60 peer-reviewed publications and conference presentations, published in an end of study report to our  
61 funder (the National Institute for Health Research, UK), and presented to key stakeholders.

62

### 63 **Trial Registration Number**

64 ISRCTN registry, ISRCTN95243114, 14<sup>th</sup> February 2018

65

### 66 **Secondary identifying numbers**

67 University College London/University College London Hospitals Joint Research Office 17/0726

68 National Institute for Health Research, UK 16/88/06

69

## Article Summary: Strengths and limitations of this study

### Strengths

- Patient-centred, mixed methods approach, based on a robust understanding of the evidence on social, cultural and personal factors that influence adherence to medication to treat tuberculosis.
- Evidence and experience of adherence captured from a variety of perspectives from across the UK, including patients, their carers, and healthcare workers.
- Generalisable patient population of individuals at risk of non-adherence across low tuberculosis (TB) incidence settings.
- Development of a pragmatic and easy-to-use tool that captures the best evidence on adherence and allows its application in the clinic setting.

### Limitations

- The study culminates in a pilot trial of the manualised intervention; a larger subsequent definitive trial is needed to test whether the intervention is efficacious and cost-effective beyond any initial conclusions regarding validity and feasibility derived from the pilot.



## 88 Introduction

89  
90 Against a background of rising tuberculosis (TB) in the 1990s and 2000s, the need for a  
91 comprehensive approach to TB control in England was deemed necessary by Public Health England  
92 (PHE) and the National Health Service (NHS) England. In January 2015, these bodies jointly launched  
93 the 'Collaborative Tuberculosis Strategy for England 2015-2020'[1]. This seeks to reduce TB  
94 incidence, decrease health inequalities, and ultimately contribute to international efforts to  
95 eliminate TB as a public health problem. Ensuring that people can take all of their medication as  
96 prescribed is one of the strategy's priorities, as poor adherence to treatment for TB is a driver of  
97 worse patient outcomes[2–9], increases the risk of transmission (due to delayed sputum culture  
98 conversion)[10], and can promote the development of drug resistance[3,11–16]. Subsequent  
99 National Institute for Health and Care Excellence (NICE) guidance noted the lack of robust TB  
100 research in this area[17].

101  
102 Barriers to optimal adherence to treatment for TB may occur for a number of reasons. These  
103 include:

- 104 • patient-related factors, including perceptions and beliefs,
- 105 • cultural influences and current mental state,
- 106 • structural economic factors and social support networks,
- 107 • health service factors that include treatment complexity as well as accessibility of those  
108 services and the relationships patients develop with service providers[18,19].

109  
110 Non-adherence is not a single issue and may take various forms e.g. suboptimal implementation  
111 (skipping doses), or stopping treatment early (for example, as soon as a patient feels better; this is  
112 discontinuation)[20].

113  
114 Although a series of studies have been undertaken to define the population groups most at risk of  
115 non-adherence[19], it is currently difficult, prior to starting medication, to identify who may struggle  
116 with taking treatment as prescribed. To date, methods to support treatment address some, but not  
117 all, of the important underlying reasons for poor adherence. For example, the World Health  
118 Organization's recent focus on digital technologies reflects our attention on individual-level  
119 determinants of adherence and reminder/observation-based systems[21]; far less research has  
120 addressed the social and structural barriers to staying on TB treatment.

121  
122 In the UK, the development of an intervention to support adherence to treatment that is sensitive to  
123 the individual's cultural background and social circumstances, and can be routinely delivered within  
124 the NHS, is critical. To this purpose, a mixed-methods, patient-centred, approach to the study of the  
125 (modifiable factors that influence patients' adherence to treatment for TB is required.

## 126 127 Methods and analysis

### 128 129 Research question

130 Can a manualised package of intervention be developed to help overcome the social and cultural  
131 factors that lead to poor adherence to treatment in NHS patients in the United Kingdom with active  
132 TB?

### 133 134 Aim

135 To develop, pilot, and evaluate process and interim outcomes for an effective manualised  
136 intervention that improves the likelihood of adherence to treatment among NHS patients at risk of  
137 poor adherence due to social, cultural, and structural factors.

## Objectives

- 1) Synthesise current knowledge on (a) determinants of adherence to treatment for TB, and (b) interventions that can support adherence, with particular emphasis on social and cultural barriers. (Scoping Review and Conceptual Framework)
- 2) Apply a conceptual framework of adherence endorsed by NICE guidelines (the Perceptions and Practicalities (PAPA) approach [18] to elucidate and address the personal, socio-cultural, and health systems context, mechanisms, and pathways of poor adherence among NHS patients with TB. (Formative Research)
- 3) Develop a manualised intervention (a series of systematic actions applied on the basis of a patient's needs assessment) with multiple components that can identify (a) NHS patients most at risk of non-adherence, (b) the salient modifiable barriers, and (c) the tailored support mechanisms required to meet individual patient needs by matching appropriate interventions to specific barriers, as recommended by NICE. (Development of Intervention)  
A manualised intervention was considered to be a suitable approach to managing adherence in TB, as it will enable a set of measures to be applied consistently within different NHS settings that will aid both clinicians and patients throughout the treatment journey. The content of the intervention will use existing support measures, employed in a systematic and structured way, and may also include any new interventions that are developed in response to the formative research. It will be compared to normal care.
- 4) Pilot the intervention package in people at risk of poor adherence to define how the components work in combination and separately. (Pilot Study)
- 5) Evaluate the process of implementation of this intervention through describing the challenges and facilitators in delivering the package as intended (fidelity, reach) and assessing the impact of the intervention through evaluation of adherence indicators. (Process Evaluation)
- 6) Use the findings of the pilot to assess the costs of delivering the manualised intervention in an NHS setting, and to guide development of a proposal for a full randomised controlled trial (RCT).

## Study design

This study uses a mixed methods approach. There are six sub-sections, reflecting the six objectives: i) Scoping Review and Conceptual Framework, ii) Formative Research, iii) Development of Intervention, iv) Pilot Study, v) Process Evaluation, vi) Cost Analysis and Future Work. Although the different elements are described separately below, the research activities for each will overlap, and some will run concurrently. The full programme of work and relationships between subsections is shown in Figure 1. This paper reflects protocol version 4.0 (26<sup>th</sup> September 2019)[22].

### i. Scoping Review

To underpin the development of the manualised intervention, the first study sub-section will undertake literature reviews to answer the following research questions:

- i) What personal, social, cultural, health systems-related and structural factors affect individuals' ability to adhere to treatment for TB?
- ii) What kinds of intervention have been developed to address the multiple levels (personal, social, cultural, systems and structural) at which barriers to adherence may operate?
- iii) What is the evidence for the successful impact of interventions to address barriers to adherence to treatment for TB?

These questions will be answered through the three following reviews:

1  
2  
3 189 **1) A scoping review of qualitative studies** that examine the personal, social, cultural, health  
4 190 systems-related and structural factors affecting adherence to treatment for TB from the  
5 191 perspectives of adult patients, care givers, or health care providers, as well as studies that evaluate  
6 192 interventions to support adherence to treatment for TB. Data from all settings will be considered,  
7 193 but with a particular focus on low incidence, high income, settings.  
8 194

9  
10 195 **2) A critical review of quantitative studies** examining the personal, social, cultural, health systems-  
11 196 related and structural factors affecting adherence to treatment for TB. This review focuses on low  
12 197 incidence, high income, settings and observational study designs. Given the scoping nature of the  
13 198 review, findings will be descriptively analysed and not be stratified or disaggregated e.g. by site of  
14 199 disease. All relative and absolute measures of effect will be extracted.  
15 200

16 201 **3) A critical review of quantitative studies that have examined the effectiveness of interventions**  
17 202 **to improve adherence in people taking treatment for TB**, building on existing systematic reviews,  
18 203 including the provision and delivery of information and/or education; enablers and/or incentives;  
19 204 social support; case management approaches. Given the more limited literature, both observational  
20 205 studies and clinical trials will be included, from all settings. Findings will be descriptively analysed.  
21 206

22  
23 207 Together, these three reviews will enable us to conduct a critical interpretive synthesis of findings  
24 208 from qualitative and quantitative studies examining the assumptions and mechanisms of effect  
25 209 underlying interventions to improve adherence to treatment for TB. Further details on the reviews  
26 210 are available in the full protocol[22].  
27 211

## 28 212 **ii. Formative Research**

### 29 213 **Formative research methods, recruitment and eligibility**

30 214  
31 215  
32 216 In line with findings from the scoping review, we will develop topic guides for qualitative interviews  
33 217 exploring current models of TB service delivery in the study sites, providers' views on the barriers  
34 218 and facilitators for treatment adherence, and TB patients' and their family members' experiences of  
35 219 starting and staying on treatment. Details about these guides are available within the full  
36 220 protocol[22]. The thematic analysis of these interviews will complement insights gained from the  
37 221 scoping reviews which will allow us to refine a conceptual framework of adherence building on the  
38 222 Perceptions and Practicalities Approach (PAPA) [18]. Approximately 60 participants will be enrolled.  
39 223

40 224 Adults (aged 18 and over) who are currently taking or recently completed treatment will be  
41 225 identified by the local TB service at four UK sites (Edinburgh, London [Central London & East London]  
42 226 and Southampton) and asked to take part in the study. The services have been chosen for their  
43 227 patient diversity, geographic spread and as reflecting the national TB picture. The patient group will  
44 228 be enriched with people who have been poorly adherent to treatment, although we will also include  
45 229 patients who report full adherence so that we can capture what may have enabled them to take  
46 230 treatment as prescribed. With patient consent, family members and/or carers will also be  
47 231 approached and asked to participate.  
48 232

49 233 Health and social care workers from both primary and secondary care settings will be directly  
50 234 approached by researchers and invited to be interviewed. All those approached will be aged 18 or  
51 235 over and involved in TB management and care.  
52 236

### 53 237 **Data collection methods**

54 238  
55 239 Three different methods of data collection will be used to undertake the formative research.  
56 240  
57  
58  
59  
60

### 1) In-depth interviews – patients and family members/carers

These will be conducted as individual interviews with approximately 30 participants, using a topic guide. The areas to be explored are: self-perception; personal beliefs and practices related to medicine-taking; health literacy and health-seeking behaviour; social support; cultural norms around health-seeking behaviour; financial and other structural barriers.

### 2) Testing of BMQ and BIPQ Questionnaires with patients for their suitability

To ensure that the validated questionnaires (i.e. Beliefs about Medicines Questionnaires[23] and the Brief Illness Perception Questionnaire[24], are accessible and acceptable to patients, we will also conduct cognitive interviews with 10 patients. We will then have confidence to use them in the later pilot study to assess patient perceptions and practicalities affecting adherence to anti-TB therapy. These will explore self-perception; personal beliefs; and practices related to medicine-taking.

### 3) Semi-structured interviews – healthcare providers

These will be undertaken with health care providers responsible for multiple aspects of TB care (doctors, nurses, social workers, directly observed therapy [DOT] providers, managers and administrators). They will focus on providers' perceptions of factors affecting patient understanding of TB and its treatment; service delivery models including staffing; organisation of care; communication. We will interview four to six providers at each site, aiming for a total of 20 interviews.

We will use a framework approach [25] to facilitate initial analysis of the interview transcripts. Short patient case studies will be created for each patient interview. Data on health systems issues gained through mapping patient pathways and provider interviews will be organised using a deductive approach, with appropriate visual pathways.

## iii. Development of the manualised intervention

### Intervention development process

The data collected from the scoping reviews and formative research will be presented to, and synthesised by, an Intervention Development Group (IDG). A manualised intervention will be developed to identify (a) NHS patients most at risk of non-adherence, (b) their salient modifiable barriers, and (c) the tailored support mechanisms that meet individual patient needs by matching appropriate interventions to these specific barriers.

The IDG will include:

- patients (in particular the homeless, ethnic minorities, migrants new to the UK, and patients with drug resistant TB)
- family members/significant others of affected persons
- members of the public
- health care professionals (from both primary and secondary care)
- other professionals who work with patients/communities affected by TB

The constitution of the IDG will enable a co-production approach to ensure that the intervention is pragmatic, can be delivered within the context of existing care pathways, and is of benefit to service users and those who are likely to access the intervention.

### Intervention contents

The manualised intervention is likely to consist of a screening and assessment tool, in addition to a package of measures that can be tailored to the needs of individual patients from different population groups.

As patterns of adherence may be irregular over time, it is intended that the manualised intervention will be administered to all patients at each patient review. The tool thus needs to be quick and easy to administer. It may be electronically linked to patient records, enabling a comprehensive picture of the risk of possible non-adherence to be developed for each patient, as well as within a clinic population. The various delivery options for the intervention (such as using paper or an app) will be considered during its development stage.

The menu of supportive measures may, for example, include:

- Informational intervention: e.g. providing a convincing story setting out the rationale and on-going need for medication, addressing concerns about potential adverse effects and consequences of treatment and what to do if such events occur e.g. the participant will be informed that it is possible to change their treatment regimens to alternatives[26].
- Practicalities and Capability based interventions: video observed therapy [VOT], DOT, reminders including text messaging, automated methods for monitoring and feedback including electronic dosette boxes, use of a medication app, incentives e.g. financial and food vouchers, mitigation and management of drug toxicity due to treatments.
- Social and system interventions: offering flexibility in appointments; enhanced guidance on 'navigating' clinic pathways; signposting patients to relevant services, e.g. housing, drug and alcohol services, and social care; providing peer-support.

#### iv. Piloting the intervention

##### Study design, recruitment and eligibility

Once the intervention is developed, proof-of-concept is required within the real world. This will be undertaken using a non-blinded cluster randomised pilot study that compares the manualised intervention to the usual standard of care in four London clinics treating TB. Two clinics will be randomly allocated to the intervention and two to standard of care. In the latter, the amount of support provided to patients is based on perceived need, as identified by a nurse-led review and a needs assessment. Most patients will have supported self-administered therapy, whilst others will be offered DOT and/or VOT if this is felt to be appropriate. We anticipate enrolment to commence in January 2020 (recruitment is pending).

All consecutive patients aged 18 or over who are about to start treatment for TB, irrespective of site of disease, will be approached to take part in the study. We will exclude individuals who are unable to provide informed consent, those already on treatment and those who are not expected to live for the duration of the study (a minimum of six months from starting treatment). Within the pilot study, it is essential to capture the entire treatment period for each patient, in order to assess the effectiveness of the intervention. Due to the nature of the TB patient population in the UK, patients are likely to include people at greater risk of poor adherence such as migrants newly arrived in the UK, people whose first language is not English, people with a mental health disorder, people taking immunosuppressive therapy or known to have immunodeficiency, those with a previous history of treatment for TB, or poor-adherence with anti-TB medication, and people with a current or previous history of drug or alcohol misuse.

The purpose of the pilot study is not formal hypothesis testing. Given this, a target sample size of 80 patients enrolled (20 per site) was identified for the pilot study as providing useful information that can help determine whether the intervention will be deliverable within a clinical setting. It will also guide the development of a possible larger definitive study using the intervention. The four TB clinics of interest (in East and North London) each treat in excess of 60 relevant patients per annum.

Based on usage of DOT within the clinic populations seen at the treatment sites (i.e. individuals



1  
2  
3 342 currently identified as needing adherence support), we estimate that around 33% of patients will be  
4 343 at risk of non-adherence. Taking this as a minimum (as the manualised intervention is likely to be  
5 344 more sensitive than current risk assessments), we would expect that at least 26 of the 80 patients  
6 345 recruited will be identified as requiring adherence support. This sample size allows us to measure  
7 346 consent to enrolment for 80 individuals, data completeness for adherence and treatment outcomes  
8 347 for 80 individuals, data on acceptability and feasibility of the intervention package for around 40  
9 348 individuals, and data on acceptability and feasibility of adherence support for at least 26 individuals  
10 349 (13 receiving the manualised intervention and 13 standard care).  
11 350

### 12 351 **Outcomes of the pilot**

13 352 The primary outcome of the study will be level of adherence, measured as the proportion of  
14 353 prescribed doses taken and assessed at six months from the start of treatment. In addition to this  
15 354 primary outcome, a number of secondary outcomes will also be measured, as follows:  
16 355

- 17 356 1) Proportion consenting to the study.
- 18 357 2) Completeness of data for measures of adherence.
- 19 358 3) Proportion of patients withdrawing during the study and the reasons why.
- 20 359 4) Proportion of patients identified as needing adherence support in the intervention arm.
- 21 360 5) Proportion of patients offered adherence support and accepting it in the intervention arm.
- 22 361 6) Documentation of which adherence-promoting activities have been implemented among  
23 362 patients both in the standard of care and intervention arm, and when.
- 24 363 7) Detailed treatment implementation information: e.g. proportion of patients completing  
25 364 treatment, proportion of patients still on treatment after nine months or at study  
26 365 completion (whichever is the earlier).
- 27 366 8) Patterns of adherence (implementation and discontinuation).
- 28 367 9) Impact of manualised intervention on maintaining adherence over the duration of  
29 368 treatment.
- 30 369 10) Process variables – adherence-related perceptions and practicalities.

### 31 370 **Measures of adherence**

32 371 Our primary measure of adherence will be data obtained from medication monitoring boxes [27].  
33 372 The boxes will not be set up act as a reminder system. Other measures will also be used and  
34 373 compared with this. These will include pill counts (the remaining medication in the box at the end of  
35 374 each month), and also patient-reported adherence, where we will ask patients to estimate how  
36 375 many doses they have missed in the last month. In the case of DOT or VOT methods being used, a  
37 376 record of missed doses will be kept.  
38 377  
39 378

### 40 379 **Administration of the manualised intervention**

41 380 The patient's case manager (usually the TB clinic nurse), plus a study research nurse, will apply the  
42 381 intervention in partnership with the patient to identify whether personal, socio-cultural and/or  
43 382 systems risk factors are present that suggest likely poor adherence with treatment. If these are  
44 383 identified, then the relevant measures outlined in the manualised intervention that may mitigate  
45 384 these will be reviewed and implemented with the agreement of the participant. These will be  
46 385 continued throughout the course of treatment, or stopped if no longer deemed to be relevant or  
47 386 required on reassessment.  
48 387

### 49 388 **Study schedule of visits**

50 389 Study subjects will be seen at weeks 0, 2, 4, 8, 12, 16, 20 and 24 (earliest date of treatment  
51 390 completion). Should they require on-going treatment after six months, they will be seen as clinically  
52 391 indicated. At each review, adherence assessments will be performed in addition to an assessment of  
53 392 perceptions and practicalities, the completion of the BMQ and the EQ-5D-5L Quality of Life  
54 393  
55 394  
56 395  
57 396  
58 397  
59 398  
60 399

1  
2  
3 393 questionnaires [23,28] and the GAD-7 [29] and PHQ-9[30] to assess anxiety and depression. The  
4 394 manualised intervention will be applied if the patient is attending a clinic that has been randomised  
5 395 to the intervention arm. All data will be collected by the research nurse, using standardised forms.  
6 396

#### 7 397 **Follow Up**

8 398 Most patients who do not have clinically important drug resistant disease receive six months of  
9 399 treatment. To allow for treatment interruptions, patients within the pilot study will be followed to  
10 400 either treatment completion or for a total of nine months from starting anti-TB therapy.  
11 401

#### 12 402 **Analysis and interpretation**

13 403 Where possible, univariable analyses will be undertaken to compare each outcome measure listed  
14 404 between study arms (intervention and control). For the primary outcome (adherence) the mean  
15 405 percentage value will be reported by arm (intervention and control) and histograms used to describe  
16 406 the distribution of values by study arm. Binary secondary outcomes will be reported by the  
17 407 proportion of individuals achieving the outcome within each arm. The need to adjust for clustering  
18 408 by site and clinical care provider will be assessed using the cluster summary method (a t-test to  
19 409 compare the cluster means or proportions [as appropriate, two values per arm] between arms). An  
20 410 assessment of the balance in baseline characteristics between the study arms will also be conducted.  
21 411 If randomisation has failed to evenly distribute key characteristics (e.g. age, sex, ethnicity, or other  
22 412 factors identified as important during the scoping reviews), then the cluster means or proportions  
23 413 will be adjusted for these differences before applying the t-test. This two-stage approach to analysis  
24 414 is described by Hayes and Moulton [31]. We recognise that adherence data may be highly skewed  
25 415 and thus require compensatory analytical approaches.  
26 416

27 417 The analysis of the first three of our secondary outcomes will address the feasibility of a definitive  
28 418 trial following a similar design to the pilot. Analysis of secondary outcomes four to six addresses the  
29 419 intervention, and complements the process evaluation (see below). Analysis of the primary outcome  
30 420 and final secondary outcomes around treatment adherence and completion provides initial  
31 421 information - given the modest sample size - concerning the effectiveness of the intervention, and  
32 422 may assist the sample size calculation for the definitive trial. They can also offer an alert in the  
33 423 unlikely event that the intervention is harmful.  
34 424

#### 35 425 **Power calculation**

36 426 Although we are undertaking a pilot study and thus the numbers enrolled are small, Table 1  
37 427 indicates the power of our primary analysis to detect a range of absolute increases in adherence (10-  
38 428 30%) from a variety of baseline values (50-90%).  
39 429  
40 430  
41  
42  
43  
44  
45  
46  
47  
48  
49  
50  
51  
52  
53  
54  
55  
56  
57  
58  
59  
60



1  
2  
3 **431 Table 1- Power calculation for the pilot study**

4 432 Given a sample size of 80 individuals (40 per arm), across a range of baseline levels of adherence and  
5 433 absolute increases in that level, the pilot study has the following power.

6 434  
7 435

|        | Baseline adherence | Absolute increase | Power |
|--------|--------------------|-------------------|-------|
| 8 436  | 70                 | 30                | 0.98  |
| 9 437  | 60                 | 30                | 0.88  |
| 10 438 | 50                 | 30                | 0.82  |
| 11 439 | 80                 | 20                | 0.86  |
| 12 440 | 70                 | 20                | 0.61  |
| 13 441 | 60                 | 20                | 0.49  |
| 14 442 | 90                 | 10                | 0.54  |
| 15 443 | 80                 | 10                | 0.24  |
| 16 444 | 70                 | 10                | 0.18  |

17 445  
18 446  
19 447

20 448 **v. Process evaluation**

21 449  
22 450 **Evaluation method**

23 451 We will evaluate the implementation process by analysing the challenges and facilitators in  
24 452 delivering the package. The impact of the intervention will be assessed by evaluation of adherence  
25 453 indicators. We will use the findings of the pilot to assess the costs of delivering the manualised  
26 454 intervention in an NHS setting, and to guide development of a proposal for a full RCT.

27 455  
28 456 The process evaluation will consist of a description of the process of intervention implementation. It  
29 457 will assess how well the manualised intervention achieves its intended aim compared to standard  
30 458 care.

31 459  
32 460 We will consider:

- 33 461 1) The fidelity of the intervention as delivered in comparison to how it was designed and  
34 462 envisaged,  
35 463 2) The reach of the intervention (the proportion of the target group receiving it),  
36 464 3) The barriers to facilitating implementation of the intervention and how these can be  
37 465 addressed,  
38 466 4) The pre-existing factors that facilitated implementation.

39 467  
40 468 **Process measures, recruitment and eligibility**

41 469 Process measures for each element of the package will be developed once the manual development  
42 470 has been completed, and used to assess success. They will include acceptability, uptake and change  
43 471 in practice. We will work with patients and staff separately at all four London sites. We will interview  
44 472 20 patients (five at each study site i.e. 10 from each arm); and, if possible, 20 health care workers  
45 473 (five at each site). The patients will be selected within each site using purposeful sampling of clinic  
46 474 lists of every patient with active TB, to enable us to reflect the demographic spread of patients.

47 475  
48 476 Key outputs will include a qualitative evaluation of delivery, the development of a narrative  
49 477 description of the process of intervention implementation and maintenance and a quantitative  
50 478 assessment of adherence-related perceptions and practicalities within intervention and control  
51 479 groups.

52 480  
53 481 We will invite participation in the process evaluation from patients enrolled in the pilot study or staff

1  
2  
3 482 members treating patients at one of the four London sites also involved in delivering the pilot study.  
4 483 They will be included if they are aged 18 or over and able to provide informed consent. This will  
5 484 include probing anticipated versus real-life delivery of the intervention.  
6 485

## 8 486 **vi. Cost Analysis and Future Work**

9 487  
10 488 In order to generate realistic estimates of the cost of the intervention, cost data from the NHS  
11 489 perspective will be collected during the pilot study using a cost data collection tool used by health  
12 490 economists (The Client Service Receipt Inventory, CSRI), modified for TB [32].  
13 491

14 492 After the pilot study and process evaluation have been completed, a final intervention package will  
15 493 be designed for use in a definitive RCT of the manualised package of interventions. The design of this  
16 494 final package will be based on the results of the process evaluation and the experience gained during  
17 495 the piloting of the intervention, modifying the definitive trial design and/or data collection  
18 496 accordingly.  
19 497

## 21 498 **Patient and public engagement**

22 499 As documented above, patient representatives will sit on the IDG for the study. In addition, TB Alert,  
23 500 the UK's only national TB charity, has membership of the IDG. The role of the IDG, which will meet  
24 501 regularly throughout the study, is described in section iii. At the end of the study, the IDG will be  
25 502 involved in commenting on the findings and contributing to the dissemination plan.  
26 503

## 29 504 **Ethics, sponsorship, contact details and dissemination**

30 505 The study is sponsored by the Joint Research Office of University College London and University  
31 506 College London Hospitals. This study received ethics approval on 24<sup>th</sup> December 2018 from  
32 507 Camberwell St Giles Ethics Committee (REC reference 18/LO/1818; Level 3, Block B, Whitefriars,  
33 508 Lewins Mead, Bristol, BS1 2NT, UK; +44 (0)207104 8204; [NRESCCommittee.London-](mailto:NRESCCommittee.London-CamberwellStGiles@nhs.net)  
34 509 [CamberwellStGiles@nhs.net](mailto:CamberwellStGiles@nhs.net)). Findings will be published and disseminated through peer-reviewed  
35 510 publications and conference presentations, published in an end of study report to our funder (the  
36 511 National Institute for Health Research, UK), and presented to key stakeholders.  
37 512

38 513 For public enquiries, please contact Marcia Darvell, IMPACT Study Project Co-ordinator, Respiratory  
39 514 Medicine, The Royal Free London NHS Foundation Trust, UCL Medical School Building, Rowland Hill  
40 515 Street, London, NW3 2PF, UK; +4420 8016 8375; [m.darvell@ucl.ac.uk](mailto:m.darvell@ucl.ac.uk)  
41 516

42 517 For scientific enquiries, please contact the Chief Investigator Professor Marc Lipman (The Royal Free  
43 518 London NHS Foundation Trust and University College London), Respiratory Medicine, The Grove  
44 519 Centre, The Royal Free London NHS Foundation Trust, Rowland Hill Street, London, NW3 2PF, UK;  
45 520 +4420 7472 6452; [marclipman@nhs.net](mailto:marclipman@nhs.net).  
46 521

## 49 522 **Data sharing statement**

50 523 The datasets generated during and/or analysed during the current study will be available upon  
51 524 request in a de-identified format and after publication of study outcomes and associated permission  
52 525 from the funder. Requests for data should be directed to Professor Marc Lipman as per the contact  
53 526 details above.  
54 527

## 57 529 **Conclusion**

58 530  
59 531 Our study will develop and pilot a manualised intervention to improve adherence to treatment for  
60

1  
2  
3 532 TB in the UK using a mixed methods, patient-centred and provider-informed approach. This will  
4 533 enable us to begin to understand what motivates patients' treatment behaviour, whilst ensuring  
5 534 deliverability within the NHS. Our work is based on a robust understanding of the evidence on social,  
6 535 cultural and personal factors that influence adherence, and the interventions that are most effective  
7 536 in addressing these. The study reflects the geographic spread of TB in the UK and captures not only  
8 537 patient and expert clinical and academic experience, but also that of family and carers to develop  
9 538 the intervention. A key feature of the study is the co-production of a pragmatic and easy-to-use tool  
10 539 that utilises the best evidence on adherence, and allows its application in the clinic setting in a  
11 540 dynamic and iterative way.

12 541  
13 542 Although the final pilot study may be limited to a relatively small sample size, it is hoped that its  
14 543 broad patient-centred perspective will make a useful contribution to our understanding of, and  
15 544 ability to deal effectively with, the risks of non-adherence to TB treatment in a population that can  
16 545 find this challenging. As many of the factors influencing adherence are likely to be generalisable to  
17 546 patients with other conditions in both high and low resource settings, this study also has the  
18 547 potential to inform adherence interventions in other disease areas.

19 548  
20 549  
21  
22  
23  
24  
25  
26  
27  
28  
29  
30  
31  
32  
33  
34  
35  
36  
37  
38  
39  
40  
41  
42  
43  
44  
45  
46  
47  
48  
49  
50  
51  
52  
53  
54  
55  
56  
57  
58  
59  
60

## 550 **Authors' contributions**

551 ML, IA, RH, KK and HRS conceived of the work. HRS, IA, AC, RH, KK, MM, AS, NV, FW, HK, EP and ML  
552 designed the work. HRS, CNJC, MD, RH, KK, drafted the manuscript. All authors critically revised the  
553 manuscript and gave final approval of the version of the protocol manuscript to be published. All  
554 authors agree to be accountable for all aspects of the work in ensuring that questions related to the  
555 accuracy or integrity of any part are appropriately investigated and resolved.

## 557 **Funding statement**

558 This work was supported by the National Institute for Health Research (NIHR) Health Technology  
559 Assessment Programme, UK grant number 16/88/06.

560  
561 The views expressed are those of the author(s) and not necessarily those of the National Health  
562 Service, UK, the NIHR or the Department of Health and Social Care.

563  
564 This is an abridged version of the full study protocol, which can be accessed at  
565 <https://www.fundingawards.nihr.ac.uk/award/16/88/06>

## 567 **Competing interests statement**

568 IA, MD, HK, KK, ML, MM, EP, AS, FW have no competing interests to declare.

569  
570 RH is supported by the National Institute for Health Research (NIHR, Collaboration for Leadership in  
571 Applied Health Research and Care (CLAHRC), North Thames at Bart's Health NHS Trust and Asthma  
572 UK (AUKCAR). Speaker engagements with honoraria with the following companies: Abbvie, Amgen,  
573 Astellas, AstraZeneca, Biogen, Erasmus, Idec, Gilead Sciences, GlaxoSmithKline, Janssen, Merck  
574 Sharp Dohme, Novartis, Pfizer, Roche, Shire Pharmaceuticals and TEVA. RH is Founding Director of a  
575 UCL-Business spin-out company (Spoonful of Sugar Ltd) providing consultancy on treatment  
576 engagement and patient support programmes to healthcare policy makers, providers and industry.

577  
578 HRS reports grants from Medical Research Council (MRC), UK, grants from National Institute for  
579 Health Research (NIHR), UK, during the conduct of the study; other from Korean CDC and Johnson  
580 and Johnson (makers of Bedaquiline), other from Latvian Society Against Tuberculosis (funding  
581 through Otsuka and Johnson and Johnson), outside the submitted work.

582  
583 CNJC reports personal fees from Public Health England, outside the submitted work.

584 **References**

- 586 1 Public Health England. Collaborative Tuberculosis Strategy for England 2015 to 2020. London:  
587 2015. [https://www.gov.uk/government/publications/collaborative-tuberculosis-strategy-for-](https://www.gov.uk/government/publications/collaborative-tuberculosis-strategy-for-england)  
588 england
- 589 2 Imperial MZ, Nahid P, Phillips PPJ, *et al*. A patient-level pooled analysis of treatment-shortening  
590 regimens for drug-susceptible pulmonary tuberculosis. *Nat Med* 2018;**24**:1708–15.  
591 doi:10.1038/s41591-018-0224-2
- 592 3 Kayigamba FR, Bakker MI, Mugisha V, *et al*. Adherence to Tuberculosis Treatment, Sputum  
593 Smear Conversion and Mortality: A Retrospective Cohort Study in 48 Rwandan Clinics. *PLoS*  
594 *One* 2013;**8**:e73501. doi:10.1371/journal.pone.0073501
- 595 4 Thomas A, Gopi PG, Santha T, *et al*. Predictors of relapse among pulmonary tuberculosis  
596 patients treated in a DOTS programme in South India. *Int J Tuberc Lung Dis* 2005;**9**:556–  
597 61.<http://www.ncbi.nlm.nih.gov/pubmed/15875929> (accessed 1 May 2019).
- 598 5 Valencia S, León M, Losada I, *et al*. How do we measure adherence to anti-tuberculosis  
599 treatment? 2017;**15**:157–65. doi:10.1080/14787210.2017.1264270
- 600 6 van den Boogaard J, Boeree MJ, Kibiki GS, *et al*. The complexity of the adherence-response  
601 relationship in tuberculosis treatment: why are we still in the dark and how can we get out?  
602 *Trop Med Int Health* 2011;**16**:693–8. doi:10.1111/j.1365-3156.2011.02755.x
- 603 7 Zhdanov V, Bilenko N, Mor Z. Risk Factors for Recurrent Tuberculosis among Successfully  
604 Treated Patients in Israel, 1999-2011. *Isr Med Assoc J* 2017;**19**:237–  
605 41.<http://www.ncbi.nlm.nih.gov/pubmed/28480678> (accessed 1 May 2019).
- 606 8 Bastard M, Sanchez-Padilla E, Hewison C, *et al*. Effects of treatment interruption patterns on  
607 treatment success among patients with multidrug-resistant tuberculosis in Armenia and  
608 Abkhazia. *J Infect Dis* 2015;**211**:1607–15. doi:10.1093/infdis/jiu551
- 609 9 Podewils LJ, Gler MTS, Quelapio MI, *et al*. Patterns of Treatment Interruption among Patients  
610 with Multidrug-Resistant TB (MDR TB) and Association with Interim and Final Treatment  
611 Outcomes. *PLoS One* 2013;**8**:e70064. doi:10.1371/journal.pone.0070064
- 612 10 Chirwa T, Nyasulu P, Chirwa E, *et al*. Levels of tuberculosis treatment adherence among sputum  
613 smear positive pulmonary tuberculosis patients attending care at Zomba Central hospital,  
614 southern Malawi, 2007-2008. *PLoS One* 2013;**8**:e63050. doi:10.1371/journal.pone.0063050
- 615 11 Arnold A, Cooke GS, Kon OM, *et al*. Drug resistant TB: UK multicentre study (DRUMS):  
616 Treatment, management and outcomes in London and West Midlands 2008–2014. *J Infect*  
617 2017;**74**:260–71. doi:10.1016/j.jinf.2016.12.005
- 618 12 Pritchard AJ, Hayward AC, Monk PN, *et al*. Risk factors for drug resistant tuberculosis in  
619 Leicestershire--poor adherence to treatment remains an important cause of resistance.  
620 *Epidemiol Infect* 2003;**130**:481–3.<http://www.ncbi.nlm.nih.gov/pubmed/12825732> (accessed  
621 30 Jan 2019).
- 622 13 Cadosch D, Abel Zur Wiesch P, Kouyos R, *et al*. The Role of Adherence and Retreatment in De  
623 Novo Emergence of MDR-TB. *PLoS Comput Biol* 2016;**12**:e1004749.  
624 doi:10.1371/journal.pcbi.1004749
- 625 14 Saunders NJ, Trivedi UH, Thomson ML, *et al*. Deep resequencing of serial sputum isolates of  
626 Mycobacterium tuberculosis during therapeutic failure due to poor compliance reveals  
627 stepwise mutation of key resistance genes on an otherwise stable genetic background. *J Infect*  
628 2011;**62**:212–7. doi:10.1016/j.jinf.2011.01.003
- 629 15 Shin SS, Keshavjee S, Gelmanova IY, *et al*. Development of Extensively Drug-resistant  
630 Tuberculosis during Multidrug-resistant Tuberculosis Treatment. *Am J Respir Crit Care Med*  
631 2010;**182**:426–32. doi:10.1164/rccm.200911-1768OC
- 632 16 Bradford WZ, Martin JN, Reingold AL, *et al*. The changing epidemiology of acquired drug-  
633 resistant tuberculosis in San Francisco, USA. *Lancet* 1996;**348**:928–31. doi:10.1016/S0140-  
634 6736(96)03027-9

- 1  
2  
3 635 17 NICE. NICE Guideline: Tuberculosis. Natl. Inst. Heal. Care Excell. 2016;:178.  
4 636 18 Horne R, Weinman J, Barber N, *et al.* Concordance, adherence and compliance in medicine  
5 637 taking. 2005. doi:10.1007/SpringerReference\_64584  
6 638 19 De Geest S, Sabaté E. Adherence to long-term therapies: Evidence for action. World Health  
7 639 Organization. *Eur. J. Cardiovasc. Nurs.* 2003. doi:10.1016/S1474-5151(03)00091-4  
8 640 20 Vrijens B, De Geest S, Hughes DA, *et al.* A new taxonomy for describing and defining adherence  
9 641 to medications. *Br J Clin Pharmacol* 2012;**73**:691–705. doi:10.1111/j.1365-2125.2012.04167.x  
10 642 21 World Health Organisation. *Handbook for the use of digital technologies to support tuberculosis*  
11 643 *medication adherence.* Geneva, Switzerland, Switzerland: 2017.  
12 644 [https://www.who.int/tb/publications/2018/TB\\_medication\\_adherence\\_handbook\\_2018/en/](https://www.who.int/tb/publications/2018/TB_medication_adherence_handbook_2018/en/)  
13 645 22 National Institute for Health Research (NIHR). NIHR Research Award: Intervening with a  
14 646 Manualised Package to achieve treatment adherence in people with Tuberculosis: the IMPACT  
15 647 study. <https://fundingawards.nihr.ac.uk/award/16/88/06> (accessed 9 Oct 2019).  
16 648 23 Horne R, Weinman J, Hankins M. The beliefs about medicines questionnaire: The development  
17 649 and evaluation of a new method for assessing the cognitive representation of medication.  
18 650 *Psychol Heal* 1999;**14**:1–24. doi:10.1080/08870449908407311  
19 651 24 Broadbent E, Petrie KJ, Main J, *et al.* The Brief Illness Perception Questionnaire. *J Psychosom*  
20 652 *Res* 2006;**60**:631–7. doi:10.1016/j.jpsychores.2005.10.020  
21 653 25 Gale NK, Heath G, Cameron E, *et al.* Using the framework method for the analysis of qualitative  
22 654 data in multi-disciplinary health research. *BMC Med Res Methodol* 2013;**13**:117.  
23 655 doi:10.1186/1471-2288-13-117  
24 656 26 Michie S, van Stralen MM, West R. The behaviour change wheel: A new method for  
25 657 characterising and designing behaviour change interventions. *Implement Sci* 2011;**6**.  
26 658 doi:10.1186/1748-5908-6-42  
27 659 27 Lewis JJ, Liu X, Zhang Z, *et al.* Evaluation of a medication monitor-based treatment strategy for  
28 660 drug-sensitive tuberculosis patients in China: study protocol for a cluster randomised  
29 661 controlled trial. *Trials* 2018;**19**:398. doi:10.1186/s13063-018-2650-3  
30 662 28 Herdman M, Gudex C, Lloyd A, *et al.* Development and preliminary testing of the new five-level  
31 663 version of EQ-5D (EQ-5D-5L). *Qual Life Res* 2011;**20**:1727–36. doi:10.1007/s11136-011-9903-x  
32 664 29 Spitzer RL, Kroenke K, Williams JBW, *et al.* A Brief Measure for Assessing Generalized Anxiety  
33 665 Disorder. *Arch Intern Med* 2006;**166**:1092. doi:10.1001/archinte.166.10.1092  
34 666 30 Kroenke K, Spitzer RL, Williams JBW. The PHQ-9. *J Gen Intern Med* 2001;**16**:606–13.  
35 667 doi:10.1046/j.1525-1497.2001.016009606.x  
36 668 31 Hayes RJ, Moulton LH, Moulton LH. *Cluster Randomised Trials, Second Edition.* Chapman and  
37 669 Hall/CRC 2017. doi:10.4324/9781315370286  
38 670 32 Beecham J, Knapp M. 2 Costing psychiatric interventions. In: Graham, ed. *Measuring Mental*  
39 671 *Health Needs.* London: : Gaskell 2001. 200–24.<http://www.rcpsych.ac.uk> (accessed 12 Sep  
40 672 2019).  
41 673  
42 674



1  
2  
3 **675 Figure legends**  
4

5 676

6 **677 Figure 1- The IMPACT study**

7 678 The six mixed-methods elements of the IMPACT [Intervening with a Manualised Package to Achieve  
8 679 treatment adherence in people with Tuberculosis] study and the relationships between them. The  
9 680 study is guided by a steering group, which has oversight over the entire process and culminates in a  
10 681 pilot study with associated evaluatory elements.  
11 682

12  
13  
14  
15  
16  
17  
18  
19  
20  
21  
22  
23  
24  
25  
26  
27  
28  
29  
30  
31  
32  
33  
34  
35  
36  
37  
38  
39  
40  
41  
42  
43  
44  
45  
46  
47  
48  
49  
50  
51  
52  
53  
54  
55  
56  
57  
58  
59  
60

For peer review only



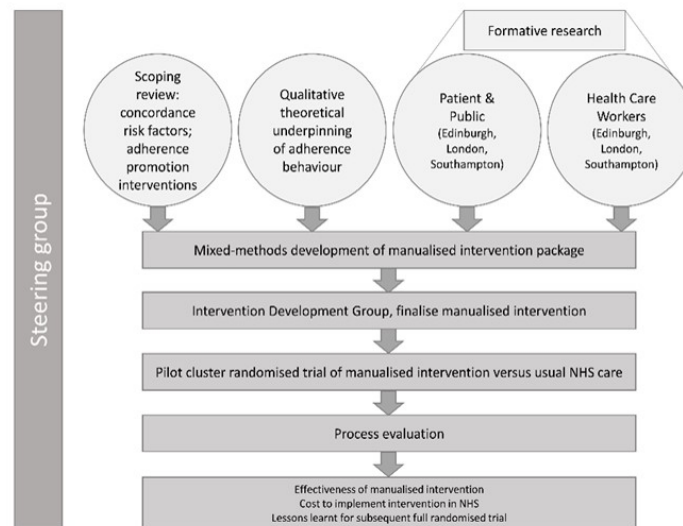

Figure 1- The IMPACT study

The six mixed-methods elements of the IMPACT [Intervening with a Manualised Package to Achieve treatment adherence in people with Tuberculosis] study and the relationships between them. The study is guided by a steering group, which has oversight over the entire process and culminates in a pilot study with associated evaluatory elements.

159x92mm (150 x 150 DPI)

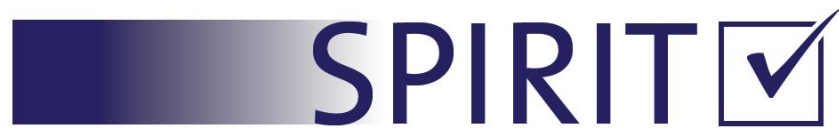

STANDARD PROTOCOL ITEMS: RECOMMENDATIONS FOR INTERVENTIONAL TRIALS

SPIRIT 2013 Checklist: Recommended items to address in a clinical trial protocol and related documents\*

| Section/item                      | Item No | Description                                                                                                  | Page  |
|-----------------------------------|---------|--------------------------------------------------------------------------------------------------------------|-------|
| <b>Administrative information</b> |         |                                                                                                              |       |
| Title                             | 1       | Descriptive title identifying the study design, population, interventions, and, if applicable, trial acronym | 1     |
| Trial registration                | 2a      | Trial identifier and registry name. If not yet registered, name of intended registry                         | 2     |
|                                   | 2b      | All items from the World Health Organization Trial Registration Data Set                                     | 1-11  |
| Protocol version                  | 3       | Date and version identifier                                                                                  | 5     |
| Funding                           | 4       | Sources and types of financial, material, and other support                                                  | 14    |
| Roles and responsibilities        | 5a      | Names, affiliations, and roles of protocol contributors                                                      | 1, 14 |
|                                   | 5b      | Name and contact information for the trial sponsor                                                           | 12    |

- 1  
2  
3  
4 5c Role of study sponsor and funders, if any, in study design; collection, management, analysis, and 14  
5 interpretation of data; writing of the report; and the decision to submit the report for publication,  
6 including whether they will have ultimate authority over any of these activities  
7

8  
9 The key roles and responsibilities are listed in the full protocol, available online and referenced at the  
10 end of the paper <https://www.fundingawards.nihr.ac.uk/award/16/88/06>  
11

12 (The page number indicated refers to the location in the manuscript of the link to the full protocol)  
13

- 14 5d Composition, roles, and responsibilities of the coordinating centre, steering committee, endpoint 14  
15 adjudication committee, data management team, and other individuals or groups overseeing the trial,  
16 if applicable (see Item 21a for data monitoring committee)  
17

18 The management of the study is described in the full protocol.  
19

20 An Intervention Development Group overseeing the development of the content for the manualised  
21 intervention and advising on the design of the pilot study is also described in the full protocol.  
22

23 (The page number indicated refers to the location in the manuscript of the link to the full protocol)  
24  
25  
26  
27  
28

29 **Introduction**

- 30  
31 Background and rationale 6a Description of research question and justification for undertaking the trial, including summary of 4  
32 relevant studies (published and unpublished) examining benefits and harms for each intervention  
33  
34 6b Explanation for choice of comparators 5  
35  
36 Objectives 7 Specific objectives or hypotheses 4-5  
37  
38  
39  
40  
41  
42

1  
2  
3  
4  
5  
6  
7  
8  
9  
10  
11  
12  
13  
14  
15  
16  
17  
18  
19  
20  
21  
22  
23  
24  
25  
26  
27  
28  
29  
30  
31  
32  
33  
34  
35  
36  
37  
38  
39  
40  
41  
42  
43  
44  
45  
46

|              |   |                                                                                                                                                                                                           |   |
|--------------|---|-----------------------------------------------------------------------------------------------------------------------------------------------------------------------------------------------------------|---|
| Trial design | 8 | Description of trial design including type of trial (eg, parallel group, crossover, factorial, single group), allocation ratio, and framework (eg, superiority, equivalence, noninferiority, exploratory) | 8 |
|--------------|---|-----------------------------------------------------------------------------------------------------------------------------------------------------------------------------------------------------------|---|

**Methods: Participants, interventions, and outcomes**

|               |   |                                                                                                                                                                                    |   |
|---------------|---|------------------------------------------------------------------------------------------------------------------------------------------------------------------------------------|---|
| Study setting | 9 | Description of study settings (eg, community clinic, academic hospital) and list of countries where data will be collected. Reference to where list of study sites can be obtained | 8 |
|---------------|---|------------------------------------------------------------------------------------------------------------------------------------------------------------------------------------|---|

|                      |    |                                                                                                                                                                                              |   |
|----------------------|----|----------------------------------------------------------------------------------------------------------------------------------------------------------------------------------------------|---|
| Eligibility criteria | 10 | Inclusion and exclusion criteria for participants. If applicable, eligibility criteria for study centres and individuals who will perform the interventions (eg, surgeons, psychotherapists) | 8 |
|----------------------|----|----------------------------------------------------------------------------------------------------------------------------------------------------------------------------------------------|---|

|               |     |                                                                                                                            |   |
|---------------|-----|----------------------------------------------------------------------------------------------------------------------------|---|
| Interventions | 11a | Interventions for each group with sufficient detail to allow replication, including how and when they will be administered | 8 |
|---------------|-----|----------------------------------------------------------------------------------------------------------------------------|---|

|  |     |                                                                                                                                                                                                |     |
|--|-----|------------------------------------------------------------------------------------------------------------------------------------------------------------------------------------------------|-----|
|  | 11b | Criteria for discontinuing or modifying allocated interventions for a given trial participant (eg, drug dose change in response to harms, participant request, or improving/worsening disease) | 8/9 |
|--|-----|------------------------------------------------------------------------------------------------------------------------------------------------------------------------------------------------|-----|

[The withdrawal procedure is outlined in detail in the main protocol.](#)

[\(The second page number indicated refers to the location in the manuscript of the link to the full protocol\).](#) 14

|  |     |                                                                                                                                                   |   |
|--|-----|---------------------------------------------------------------------------------------------------------------------------------------------------|---|
|  | 11c | Strategies to improve adherence to intervention protocols, and any procedures for monitoring adherence (eg, drug tablet return, laboratory tests) | 9 |
|--|-----|---------------------------------------------------------------------------------------------------------------------------------------------------|---|

|  |     |                                                                                               |     |
|--|-----|-----------------------------------------------------------------------------------------------|-----|
|  | 11d | Relevant concomitant care and interventions that are permitted or prohibited during the trial | 8/9 |
|--|-----|-----------------------------------------------------------------------------------------------|-----|

|    |                      |    |                                                                                                                                                                                                                                                                                                                                                                                |       |
|----|----------------------|----|--------------------------------------------------------------------------------------------------------------------------------------------------------------------------------------------------------------------------------------------------------------------------------------------------------------------------------------------------------------------------------|-------|
| 1  |                      |    |                                                                                                                                                                                                                                                                                                                                                                                |       |
| 2  |                      |    |                                                                                                                                                                                                                                                                                                                                                                                |       |
| 3  |                      |    |                                                                                                                                                                                                                                                                                                                                                                                |       |
| 4  | Outcomes             | 12 | Primary, secondary, and other outcomes, including the specific measurement variable (eg, systolic blood pressure), analysis metric (eg, change from baseline, final value, time to event), method of aggregation (eg, median, proportion), and time point for each outcome. Explanation of the clinical relevance of chosen efficacy and harm outcomes is strongly recommended | 9     |
| 5  |                      |    |                                                                                                                                                                                                                                                                                                                                                                                |       |
| 6  |                      |    |                                                                                                                                                                                                                                                                                                                                                                                |       |
| 7  |                      |    |                                                                                                                                                                                                                                                                                                                                                                                |       |
| 8  |                      |    |                                                                                                                                                                                                                                                                                                                                                                                |       |
| 9  | Participant timeline | 13 | Time schedule of enrolment, interventions (including any run-ins and washouts), assessments, and visits for participants. A schematic diagram is highly recommended (see Figure)                                                                                                                                                                                               | 9-10  |
| 10 |                      |    |                                                                                                                                                                                                                                                                                                                                                                                |       |
| 11 |                      |    |                                                                                                                                                                                                                                                                                                                                                                                |       |
| 12 | Sample size          | 14 | Estimated number of participants needed to achieve study objectives and how it was determined, including clinical and statistical assumptions supporting any sample size calculations                                                                                                                                                                                          | 10-11 |
| 13 |                      |    |                                                                                                                                                                                                                                                                                                                                                                                |       |
| 14 |                      |    |                                                                                                                                                                                                                                                                                                                                                                                |       |
| 15 |                      |    |                                                                                                                                                                                                                                                                                                                                                                                |       |
| 16 | Recruitment          | 15 | Strategies for achieving adequate participant enrolment to reach target sample size                                                                                                                                                                                                                                                                                            | 8-9   |
| 17 |                      |    |                                                                                                                                                                                                                                                                                                                                                                                |       |

#### Methods: Assignment of interventions (for controlled trials)

##### Allocation:

|    |                     |     |                                                                                                                                                                                                                                                                                                                                                          |   |
|----|---------------------|-----|----------------------------------------------------------------------------------------------------------------------------------------------------------------------------------------------------------------------------------------------------------------------------------------------------------------------------------------------------------|---|
| 19 |                     |     |                                                                                                                                                                                                                                                                                                                                                          |   |
| 20 |                     |     |                                                                                                                                                                                                                                                                                                                                                          |   |
| 21 |                     |     |                                                                                                                                                                                                                                                                                                                                                          |   |
| 22 | Sequence generation | 16a | Method of generating the allocation sequence (eg, computer-generated random numbers), and list of any factors for stratification. To reduce predictability of a random sequence, details of any planned restriction (eg, blocking) should be provided in a separate document that is unavailable to those who enrol participants or assign interventions | 8 |
| 23 |                     |     |                                                                                                                                                                                                                                                                                                                                                          |   |
| 24 |                     |     |                                                                                                                                                                                                                                                                                                                                                          |   |
| 25 |                     |     |                                                                                                                                                                                                                                                                                                                                                          |   |
| 26 |                     |     |                                                                                                                                                                                                                                                                                                                                                          |   |
| 27 |                     |     |                                                                                                                                                                                                                                                                                                                                                          |   |

[The randomisation procedure is described in the full protocol.](#) 14

[\(The second page number indicated refers to the location in the manuscript of the link to the full protocol\).](#)

1  
2  
3  
4  
5  
6  
7  
8  
9  
10  
11  
12  
13  
14  
15  
16  
17  
18  
19  
20  
21  
22  
23  
24  
25  
26  
27  
28  
29  
30  
31  
32  
33  
34  
35  
36  
37  
38  
39  
40  
41  
42  
43  
44  
45  
46

|                                  |     |                                                                                                                                                                                                           |    |
|----------------------------------|-----|-----------------------------------------------------------------------------------------------------------------------------------------------------------------------------------------------------------|----|
| Allocation concealment mechanism | 16b | Mechanism of implementing the allocation sequence (eg, central telephone; sequentially numbered, opaque, sealed envelopes), describing any steps to conceal the sequence until interventions are assigned | 14 |
|----------------------------------|-----|-----------------------------------------------------------------------------------------------------------------------------------------------------------------------------------------------------------|----|

[The randomisation procedure is described in the full protocol.](#)

[\(The page number indicated refers to the location in the manuscript of the link to the full protocol\).](#)

|                |     |                                                                                                                           |   |
|----------------|-----|---------------------------------------------------------------------------------------------------------------------------|---|
| Implementation | 16c | Who will generate the allocation sequence, who will enrol participants, and who will assign participants to interventions | 8 |
|----------------|-----|---------------------------------------------------------------------------------------------------------------------------|---|

|                    |     |                                                                                                                                           |   |
|--------------------|-----|-------------------------------------------------------------------------------------------------------------------------------------------|---|
| Blinding (masking) | 17a | Who will be blinded after assignment to interventions (eg, trial participants, care providers, outcome assessors, data analysts), and how | 8 |
|--------------------|-----|-------------------------------------------------------------------------------------------------------------------------------------------|---|

|  |     |                                                                                                                                                      |   |
|--|-----|------------------------------------------------------------------------------------------------------------------------------------------------------|---|
|  | 17b | If blinded, circumstances under which unblinding is permissible, and procedure for revealing a participant’s allocated intervention during the trial | 8 |
|--|-----|------------------------------------------------------------------------------------------------------------------------------------------------------|---|

**Methods: Data collection, management, and analysis**

|                         |     |                                                                                                                                                                                                                                                                                                                                                                                                              |    |
|-------------------------|-----|--------------------------------------------------------------------------------------------------------------------------------------------------------------------------------------------------------------------------------------------------------------------------------------------------------------------------------------------------------------------------------------------------------------|----|
| Data collection methods | 18a | Plans for assessment and collection of outcome, baseline, and other trial data, including any related processes to promote data quality (eg, duplicate measurements, training of assessors) and a description of study instruments (eg, questionnaires, laboratory tests) along with their reliability and validity, if known. Reference to where data collection forms can be found, if not in the protocol | 14 |
|-------------------------|-----|--------------------------------------------------------------------------------------------------------------------------------------------------------------------------------------------------------------------------------------------------------------------------------------------------------------------------------------------------------------------------------------------------------------|----|

[These will all be available as appendices in the full protocol. The Case Report Form will be added to the study protocol before the pilot study begins.](#)

[\(The page number indicated refers to the location in the manuscript of the link to the full protocol\).](#)

|    |             |     |                                                                                                                                                                                                                                                                    |    |
|----|-------------|-----|--------------------------------------------------------------------------------------------------------------------------------------------------------------------------------------------------------------------------------------------------------------------|----|
| 1  |             |     |                                                                                                                                                                                                                                                                    |    |
| 2  |             |     |                                                                                                                                                                                                                                                                    |    |
| 3  |             |     |                                                                                                                                                                                                                                                                    |    |
| 4  |             | 18b | Plans to promote participant retention and complete follow-up, including list of any outcome data to be collected for participants who discontinue or deviate from intervention protocols                                                                          | 14 |
| 5  |             |     |                                                                                                                                                                                                                                                                    |    |
| 6  |             |     |                                                                                                                                                                                                                                                                    |    |
| 7  |             |     | <a href="#">This is described in the full protocol.</a>                                                                                                                                                                                                            |    |
| 8  |             |     |                                                                                                                                                                                                                                                                    |    |
| 9  |             |     |                                                                                                                                                                                                                                                                    |    |
| 10 |             |     | <a href="#">(The page number indicated refers to the location in the manuscript of the link to the full protocol).</a>                                                                                                                                             |    |
| 11 |             |     |                                                                                                                                                                                                                                                                    |    |
| 12 |             |     |                                                                                                                                                                                                                                                                    |    |
| 13 | Data        | 19  | Plans for data entry, coding, security, and storage, including any related processes to promote data quality (eg, double data entry; range checks for data values). Reference to where details of data management procedures can be found, if not in the protocol. | 14 |
| 14 | management  |     |                                                                                                                                                                                                                                                                    |    |
| 15 |             |     |                                                                                                                                                                                                                                                                    |    |
| 16 |             |     |                                                                                                                                                                                                                                                                    |    |
| 17 |             |     |                                                                                                                                                                                                                                                                    |    |
| 18 |             |     | <a href="#">Details for data management are listed in the full protocol.</a>                                                                                                                                                                                       |    |
| 19 |             |     |                                                                                                                                                                                                                                                                    |    |
| 20 |             |     |                                                                                                                                                                                                                                                                    |    |
| 21 |             |     | <a href="#">(The page number indicated refers to the location in the manuscript of the link to the full protocol).</a>                                                                                                                                             |    |
| 22 |             |     |                                                                                                                                                                                                                                                                    |    |
| 23 |             |     |                                                                                                                                                                                                                                                                    |    |
| 24 | Statistical | 20a | Statistical methods for analysing primary and secondary outcomes. Reference to where other details of the statistical analysis plan can be found, if not in the protocol                                                                                           | 10 |
| 25 | methods     |     |                                                                                                                                                                                                                                                                    |    |
| 26 |             |     |                                                                                                                                                                                                                                                                    |    |
| 27 |             | 20b | Methods for any additional analyses (eg, subgroup and adjusted analyses)                                                                                                                                                                                           | 10 |
| 28 |             |     |                                                                                                                                                                                                                                                                    |    |
| 29 |             | 20c | Definition of analysis population relating to protocol non-adherence (eg, as randomised analysis), and any statistical methods to handle missing data (eg, multiple imputation)                                                                                    | 10 |
| 30 |             |     |                                                                                                                                                                                                                                                                    |    |
| 31 |             |     |                                                                                                                                                                                                                                                                    |    |

## Methods: Monitoring



1  
2  
3  
4  
5  
6  
7  
8  
9  
10  
11  
12  
13  
14  
15  
16  
17  
18  
19  
20  
21  
22  
23  
24  
25  
26  
27  
28  
29  
30  
31  
32  
33  
34  
35  
36  
37  
38  
39  
40  
41  
42  
43  
44  
45  
46

Data  
monitoring

21a

Composition of data monitoring committee (DMC); summary of its role and reporting structure; statement of whether it is independent from the sponsor and competing interests; and reference to where further details about its charter can be found, if not in the protocol. Alternatively, an explanation of why a DMC is not needed

[A formal data monitoring committee is not required for this study. See 5d for Steering committee oversight.](#)

21b

Description of any interim analyses and stopping guidelines, including who will have access to these interim results and make the final decision to terminate the trial

[This is a pilot study with limited power to detect important changes in outcome and therefore there are no plans to terminate the trial early based on interim results.](#)

Harms

22

Plans for collecting, assessing, reporting, and managing solicited and spontaneously reported adverse events and other unintended effects of trial interventions or trial conduct 14

[Adverse event reporting is described in the full protocol.](#)

[\(The page number indicated refers to the location in the manuscript of the link to the full protocol\).](#)

1  
2  
3  
4 Auditing 23 Frequency and procedures for auditing trial conduct, if any, and whether the process will be 14  
5 independent from investigators and the sponsor

6  
7  
8 [Outlined in the full protocol.](#)

9  
10 [\(The page number indicated refers to the location in the manuscript of the link to the full protocol\).](#)

11  
12  
13 **Ethics and dissemination**

14  
15 Research 24 Plans for seeking research ethics committee/institutional review board (REC/IRB) approval 12  
16 ethics  
17 approval

18  
19  
20  
21 Protocol 25 Plans for communicating important protocol modifications (eg, changes to eligibility criteria,  
22 amendments outcomes, analyses) to relevant parties (eg, investigators, REC/IRBs, trial participants, trial  
23 registries, journals, regulators)

24  
25  
26  
27 [Approval for any modification to the protocol will be sought from the sponsor, REC, and](#)  
28 [subsequently communicated to the Research Offices at all study sites.](#)

29  
30 Consent or 26a Who will obtain informed consent or assent from potential trial participants or authorised surrogates,  
31 assent and how (see Item 32)

32  
33 26b Additional consent provisions for collection and use of participant data and biological specimens in N/A  
34 ancillary studies, if applicable

44  
45  
46

1  
2  
3  
4  
5  
6  
7  
8  
9  
10  
11  
12  
13  
14  
15  
16  
17  
18  
19  
20  
21  
22  
23  
24  
25  
26  
27  
28  
29  
30  
31  
32  
33  
34  
35  
36  
37  
38  
39  
40  
41  
42  
43  
44  
45  
46

|                 |    |                                                                                                                                                                                      |    |
|-----------------|----|--------------------------------------------------------------------------------------------------------------------------------------------------------------------------------------|----|
| Confidentiality | 27 | How personal information about potential and enrolled participants will be collected, shared, and maintained in order to protect confidentiality before, during, and after the trial | 14 |
|-----------------|----|--------------------------------------------------------------------------------------------------------------------------------------------------------------------------------------|----|

[Outlined in the full protocol.](#)

[\(The page number indicated refers to the location in the manuscript of the link to the full protocol\).](#)

|                          |    |                                                                                                               |    |
|--------------------------|----|---------------------------------------------------------------------------------------------------------------|----|
| Declaration of interests | 28 | Financial and other competing interests for principal investigators for the overall trial and each study site | 14 |
|--------------------------|----|---------------------------------------------------------------------------------------------------------------|----|

|                |    |                                                                                                                                                 |    |
|----------------|----|-------------------------------------------------------------------------------------------------------------------------------------------------|----|
| Access to data | 29 | Statement of who will have access to the final trial dataset, and disclosure of contractual agreements that limit such access for investigators | 12 |
|----------------|----|-------------------------------------------------------------------------------------------------------------------------------------------------|----|

|                               |    |                                                                                                                               |    |
|-------------------------------|----|-------------------------------------------------------------------------------------------------------------------------------|----|
| Ancillary and post-trial care | 30 | Provisions, if any, for ancillary and post-trial care, and for compensation to those who suffer harm from trial participation | 14 |
|-------------------------------|----|-------------------------------------------------------------------------------------------------------------------------------|----|

[Outlined in the full protocol.](#)

[\(The page number indicated refers to the location in the manuscript of the link to the full protocol\).](#)

|                      |     |                                                                                                                                                                                                                                                                                     |    |
|----------------------|-----|-------------------------------------------------------------------------------------------------------------------------------------------------------------------------------------------------------------------------------------------------------------------------------------|----|
| Dissemination policy | 31a | Plans for investigators and sponsor to communicate trial results to participants, healthcare professionals, the public, and other relevant groups (eg, via publication, reporting in results databases, or other data sharing arrangements), including any publication restrictions | 14 |
|----------------------|-----|-------------------------------------------------------------------------------------------------------------------------------------------------------------------------------------------------------------------------------------------------------------------------------------|----|

[Outlined in the full protocol.](#)

[\(The page number indicated refers to the location in the manuscript of the link to the full protocol\).](#)

1  
2  
3  
4 31b Authorship eligibility guidelines and any intended use of professional writers

5  
6 [Academic papers will be published according to UCL's policy on publications](https://www.ucl.ac.uk/library/open-access/ucl-publications-policy-2012)  
7 <https://www.ucl.ac.uk/library/open-access/ucl-publications-policy-2012>

8  
9 Professional writers will not be used.

10  
11  
12  
13 31c Plans, if any, for granting public access to the full protocol, participant-level dataset, and statistical  
14 code

15  
16  
17 The full protocol is available on the NIHR website <https://fundingawards.nihr.ac.uk/award/16/88/06>.  
18 All research outputs will be deposited in the UCL repository in Open Access. We have no plans for  
19 the dataset to be made available.  
20  
21

22  
23  
24 **Appendices**

|    |            |    |                                                                                                    |
|----|------------|----|----------------------------------------------------------------------------------------------------|
| 25 |            |    |                                                                                                    |
| 26 | Informed   | 32 | Model consent form and other related documentation given to participants and authorised surrogates |
| 27 | consent    |    |                                                                                                    |
| 28 | materials  |    | <a href="#">Model consent form and PIS will be made available on the study website.</a>            |
| 29 |            |    |                                                                                                    |
| 30 | Biological | 33 | Plans for collection, laboratory evaluation, and storage of biological specimens for genetic or    |
| 31 | specimens  |    | molecular analysis in the current trial and for future use in ancillary studies, if applicable     |
| 32 |            |    | N/A                                                                                                |

33  
34 \*It is strongly recommended that this checklist be read in conjunction with the SPIRIT 2013 Explanation & Elaboration for important clarification on  
35 the items. Amendments to the protocol should be tracked and dated. The SPIRIT checklist is copyrighted by the SPIRIT Group under the Creative  
36 Commons "[Attribution-NonCommercial-NoDerivs 3.0 Unported](#)" license.  
37  
38  
39  
40  
41  
42
